# Supplementary material for: Identification of Thermus aquaticus DNA polymerase variants with increased mismatch discrimination and reverse transcriptase activity from a smart enzyme mutant library
Source: PubMed Central journal article supplement (PMC6345897; doi:10.1038/s41598-018-37233-y), 2019-01-24
Supplement: 41598_2018_37233_MOESM1_ESM.pdf [file 41598_2018_37233_MOESM1_ESM.pdf]

# Identification of *Thermus aquaticus* DNA polymerase variants with increased mismatch discrimination and reverse transcriptase activity from a smart enzyme mutant library

Govindan Raghunathan and Andreas Marx\*

Department of Chemistry, University of Konstanz, Universitätsstraße 10, D-78457 Konstanz, Germany

\*Correspondence should be addressed to Email: andreas.marx@uni-konstanz.de

## Supplementary Data

### CONTENTS

**Table S1.** Oligonucleotide template used in this study

**Table S2.** Mutagenic oligonucleotides of active mutants

**Figure S1.** Analysis of expression profile of selected target sites by SDS-PAGE

**Figure S2.** Nucleotide sequence analysis of random mutants from the combinatorial library to confirm mutagenesis at multiple target sites

**Figure S3.** SDS-PAGE analysis of affinity purified KlenTaq DNA polymerase variants

**Figure S4.** Primer extension analysis of KlenTaq variants for increased mismatch discrimination

**Figure S5.** Nucleotide sequence analysis of KlenTaq variant Mut\_ADL to depict the mutational sites

**Figure S6.** Sanger sequencing analysis of amplified products

**Figure S7.** Single nucleotide misinsertion assay for wild type KlenTaq DNA polymerase and Mut\_ADL

**Figure S8.** Improved allelic discrimination on different sequence context

**Figure S9.** Sequence alignment of Mut\_RT and wild type to reveal the change of codon at mutational sites

**Figure S10.** SDS-PAGE analysis of affinity purified Mut\_RT along with wild type

**Figure S11.** Specific activities of KlenTaq DNA polymerase variants on DNA or RNA template

**Figure S12.** Sanger sequencing analysis of Mut\_RT amplified products

**Table S1. Oligonucleotide template used in this study**

| <u>Label</u>      | <u>Sequence</u>                                                                                                                                                                                    |
|-------------------|----------------------------------------------------------------------------------------------------------------------------------------------------------------------------------------------------|
| DNA<br>template   | 5'-d(ACC TTA GAC CCA CCC CTC CTG GCG GGC ACA CCC CCT ACT GAC CCA CCC TTG TGA ATT CTC AGT TAA TCC CGT<br>CTA CCA GTC TCA CCA AGG CC)3'                                                              |
| DNA<br>template_1 | 5'-d(AGC AAC AAA TAC TTC TAG GTT CAC CAC GTT TCC AAC TTT TAA ATC AGG AAT ATG GTT CAA CAG GAA TGG GAT<br>AAA ACT TTA ATA TTT TTA AAA ATT AAG AAA AAG GCC GGG CGC GGT GGC CCA CCC CTG TAA TCC CA) 3' |

**Table S2. Mutagenic oligonucleotides of active mutants**

Table showing selected 12 target sites for site-specific shuffling to construct combinatorial library. Active single mutants of the respective target sites were included for shuffling and the Mutagenic oligonucleotide of 173 active mutants were pooled in shuffling reaction.

|                                                                                                           | N483 | E507 | S515 | K540 | A570 | D578 | V586 | V783 | I614 | H639 | F667 | M747 |
|-----------------------------------------------------------------------------------------------------------|------|------|------|------|------|------|------|------|------|------|------|------|
| Ala                                                                                                       | ✓    | ✓    | ✓    | ✓    | +    | ✓    | ✓    | ✓    | ✓    | ×    | ×    | ✓    |
| Cys                                                                                                       | ✓    | ✓    | ×    | ×    | ✓    | ✓    | ✓    | ✓    | ✓    | ×    | ×    | ✓    |
| Asp                                                                                                       | ✓    | ✓    | ✓    | ×    | ×    | +    | ×    | ✓    | ×    | ×    | ×    | ×    |
| Glu                                                                                                       | ✓    | +    | ✓    | ×    | ✓    | ✓    | ✓    | ✓    | ✓    | ×    | ×    | ✓    |
| Phe                                                                                                       | ×    | ✓    | ×    | ✓    | ✓    | ✓    | ✓    | ✓    | ✓    | ✓    | +    | ✓    |
| Gly                                                                                                       | ✓    | ✓    | ✓    | ✓    | ✓    | ✓    | ✓    | ✓    | ✓    | ×    | ×    | ✓    |
| His                                                                                                       | ✓    | ×    | ✓    | ✓    | ✓    | ✓    | ✓    | ✓    | ✓    | +    | ×    | ✓    |
| Ile                                                                                                       | ✓    | ✓    | ×    | ✓    | ✓    | ✓    | ✓    | ✓    | +    | ×    | ✓    | ✓    |
| Lys                                                                                                       | ✓    | ✓    | ✓    | +    | ✓    | ✓    | ✓    | ✓    | ✓    | ×    | ×    | ✓    |
| Leu                                                                                                       | ✓    | ✓    | ×    | ✓    | ✓    | ✓    | ✓    | ✓    | ✓    | ×    | ✓    | ✓    |
| Met                                                                                                       | ✓    | ✓    | ✓    | ✓    | ✓    | ✓    | ✓    | ✓    | ✓    | ×    | ✓    | +    |
| Asn                                                                                                       | +    | ✓    | ✓    | ✓    | ✓    | ✓    | ✓    | ✓    | ✓    | ✓    | ×    | ✓    |
| Pro                                                                                                       | ✓    | ✓    | ×    | ×    | ×    | ×    | ×    | ×    | ×    | ×    | ×    | ✓    |
| Gln                                                                                                       | ✓    | ✓    | ✓    | ✓    | ✓    | ✓    | ✓    | ✓    | ✓    | ×    | ×    | ✓    |
| Arg                                                                                                       | ✓    | ✓    | ✓    | ✓    | ✓    | ✓    | ✓    | ×    | ✓    | ×    | ×    | ✓    |
| Ser                                                                                                       | ✓    | ✓    | +    | ✓    | ✓    | ✓    | ✓    | ✓    | ✓    | ×    | ×    | ✓    |
| Thr                                                                                                       | ✓    | ✓    | ✓    | ✓    | ✓    | ✓    | ✓    | ✓    | ✓    | ✓    | ×    | ✓    |
| Val                                                                                                       | ✓    | ✓    | ✓    | ✓    | ✓    | ✓    | +    | +    | ✓    | ×    | ×    | ✓    |
| Trp                                                                                                       | ✓    | ✓    | ×    | ✓    | ✓    | ✓    | ×    | ×    | ✓    | ×    | ×    | ✓    |
| Tyr                                                                                                       | ✓    | ✓    | ✓    | ✓    | ✓    | ✓    | ✓    | ×    | ✓    | ✓    | ✓    | ✓    |
| '✓' Active mutant included in combinatorial library construction<br>'+' Wild type<br>'×' Inactive variant |      |      |      |      |      |      |      |      |      |      |      |      |

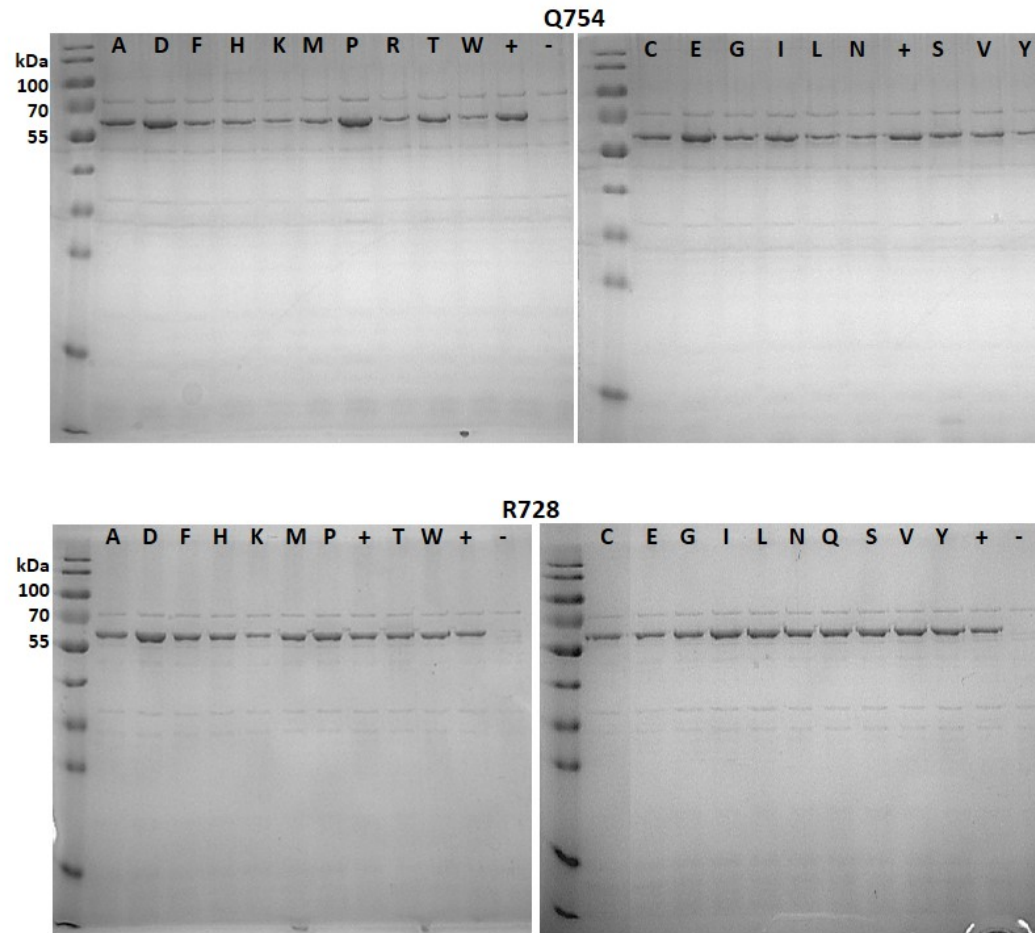

**Figure S1.**

Expression profile of target sites Q754 (upper panel) and R728 (lower panel). 19 single site mutants for each position were overexpressed, and heat denatured soluble fraction were analysed on SDS-PAGE gel. The mutants are represented in single letter notation of amino acids. "+" signifies wild type KlenTaq DNA polymerase, "-" plasmid control without insert.

610 **N483 (AAT)** 620 630 640 650 660 670 680 **E507 (GAA)** 690 700

KTQ\_pol1 gcaggccatccggttaaatctgaatagccgtgatcagctggaacgtgttctgtttgatgaactgggtctgccagcaattggtaaaaaccgaaaaaccggta  
48HH35 GCCGGCCATCCgtTTAAACTGAATAGCCGTGATCAGCTGGAACGTGTTCTGTTTATGAACTGGGTCTGCCAGCAATTGGTAAAAACCGAcaAAAccCGGTA  
48HH33 GCCGGCCATCCgtTTAAACTGAATAGCCGTGATCAGCTGGAACGTGTTCTGTTTATGAACTGGGTCTGCCAGCAATTGGTAAAAACCGTAAAAACCggTA  
48HH47 GcCgGCCATCCgtTTAAACTGAATAGCCGTGATCAGCTGGAACGTGTTCTGTTTATGAACTGGGTCTGCCAGCAATTGGTAAAAACCGAcaAAAccCGGTA  
48HH45 gcCggCCATcCgnTTAAACTGAATAgCCGTGATCAGCTgGAACgtGTTCTGTTTATGAACTGGGTctgccAGCAATTGGTAAAAACCaAAAAAccGGTA  
48HH36 GcCgGCCATCCgtTTatcCTGAATAGCCGTGATCAGCTGGAACGTGTTCTGTTTATGAACTGGGTCTGCCAGCAATTGGTAAAAACAAcAAAAACCggTA  
48HH38 GcCgGCCATCCgtTTAAACTGAATAGCCGTGATCAGCTGGAACGTGTTCTGTTTATGAACTGGGTCTGCCAGCAATTGGTAAAAACGAaAAAAACCggTA  
48HH44 GCCGGCCATCCgtTTAAACTGAATAGCCGTGATCAGCTGGAACGTGTTCTGTTTATGAACTGGGTCTGCCAGCAATTGGTAAAAACGAcaAAAccCGGTA  
48HH39 GCCGGCCATCCgtTTAAACTGAATAGCCGTGATCAGCTGGAACGTGTTCTGTTTATGAACTGGGTCTGCCAGCAATTGGTAAAAACGCCAAAAACCggTA  
48HH29 GCCGGCCATCCgtTTATcCTGAATAGCCGTGATCAGCTGGAACGTGTTCTGTTTATGAACTGGGTCTGCCAGCAATTGGTAAAAACGAcaAAAccCGGTA  
48HH46 GCCGGCCATCCgtTTAAACTGAATAGCCGTGATCAGCTGGAACGTGTTCTGTTTATGAACTGGGTCTGCCAGCAATTGGTAAAAACCGAcaAAAccCGGTA  
48HH28 GCCGGCCATCCgtTTAAACTGAATAGCCGTGATCAGCTGGAACGTGTTCTGTTTATGAACTGGGTCTGCCAGCAATTGGTAAAAACAAaAAAAACCggTA  
48HH30 GCCGGCCATCCgtTTAAACTGAATAGCCGTGATCAGCTGGAACGTGTTCTGTTTATGAACTGGGTCTGCCAGCAATTGGTAAAAACGAcaAAAccCGGTA  
48HH37 GCCGGCCATCCgtTTAAACTGAATAGCCGTGATCAGCTGGAACGTGTTCTGTTTATGAACTGGGTCTGCCAGCAATTGGTAAAAACAAaAAAAACCggTA  
48HH34 GcCggCCATCCgtTTAAACTGAATAGCCGTGATCAGCTGGAACGTGTTCTGCTTATGAACTGGGTCTGCCAGCAATTGGTAAAAACAAaAAAAACCggTA  
48HH40 GCCGGCCATCCgtTTAAACTGAATAGCCGTGATCAGCTGGAACGTGTTCTGTTTATGAACTGGGTCTGCCAGCAATTGGTAAAAACCGAcaAAAccCGGTA  
48HH31 GCCGGCCATCCgtTTAAACTGAATAGCCGTGatcAGCTGGAACGTGTTCTGTTTATGAACTggGtCTGCCAGCAATTGGTAAAAACGCCAAAAACCggTA  
48HH32 GCCGGCCATCCgtTTAAACTGAATAGCCGTGATCAGCTGGAACGTGTTCTGTTTATGAACTGGGTCTGCCAGCAATTGGTAAAAACCGcaAAAccCGGTA  
Clustal Consensus \*\* \*\*\*\*\* \* \*\*\*\*\*

710 **S515 (AGC)** 720 730 740 750 760 770 780 **K540 (AAA)** 790 800

KTQ\_pol1 aacgtagcaccagcagcagttctggaagccctgctggaagcacatccgatttggaaaaaattctgcagtatcgcgaactgaccaaaactgaaaagcac  
48HH35 AACGTAGCACCAACSCAGCAGTTCTGGAAGCCCTGCGTGAAGCACATCCGATTGTGGAaaaaattctgcagtatcgcgaactgaccAAcCTGAAAAGCAC  
48HH33 AACGTAGCACCAAAcCAGCAGTTCTGGAAGCCCTGCGTGAAGCACATCCGATTGTGGAaaaaattctgcagtatcgcgaactgaccTAcCTGAAAAGCAC  
48HH47 AACGTAGcAcCAAAcCAGCAGTTCTGGAAGCCCTGCGTGAAGCACATCCGATTGTGGAaaaaattctgcagtatcgcgaactgaccAAcCTGAAAAGCAC  
48HH45 AACGTAGCACCAACSCAGCAGTTCTGGAAGCCCTGCGTGAAGCACATCCGATTGTGGAaaaaattctgcagtatcgcgaactgaccAAcCTGAAAAGCAC  
48HH36 AACGTAGCACCAAGcCAGCAGTTCTGGAAGCCCTGCGTGAAGCACATCCGATTGTGGAaaaaattctgcagtatcgcgaactgaccAAcCTGAAAAGCAC  
48HH38 AACGTAGCACCAAAcCAGCAGTTCTGGAAGCCCTGCGTGAAGCACATCCGATTGTGGAaaaaattctgcagtatcgcgaactgaccAAcCTGAAAAGCAC  
48HH44 AACGTAGCACCAcTAcCAGCAGTTCTGGAAGCCCTGCGTGAAGCACATCCGATTGTGGAaaaaattctgcagtatcgcgaactgaccAAcCTGAAAAGCAC  
48HH39 AACGTAGCACCAcAcCAGCAGTTCTGGAAGCCCTGCGTGAAGCACATCCGATTGTGGAaaaaattctgcagtatcgcgaactgaccAAcCTGAAAAGCAC  
48HH29 AACGTAGCACCAACSCAGCAGTTCTGGAAGCCCTGCGTGAAGCACATCCGATTGTGGAaaaaattctgcagtatcgcgaactgaccAAcCTGAAAAGCAC  
48HH46 AACGTAGCACCAACSCAGCAGTTCTGGAAGCCCTGCGTGAAGCACATCCGATTGTGGAaaaaattctgcagtatcgcgaactgaccAAcCTGAAAAGCAC  
48HH28 AACGTAGCACCAAGcCAGCAGTTCTGGAAGCCCTGCGTGAAGCACATCCGATTGTGGAaaaaattctgcagtatcgcgaactgaccAAcCTGAAAAGCAC  
48HH30 AACGTAGCACCAACSCAGCAGTTCTGGAAGCCCTGCGTGAAGCACATCCGATTGTGGAaaaaattctgcagtatcgcgaactgaccAAcCTGAAAAGCAC  
48HH37 AACGTAGCACCAACSCAGCAGTTCTGGAAGCCCTGCGTGAAGCACATCCGATTGTGGAaaaaattctgcagtatcgcgaactgaccAAcCTGAAAAGCAC  
48HH34 AACGTAGCACCAAAcCAGCAGTTCTGGAAGCCCTGCGTGAAGCACATCCGATTGTGGAaaaaattctgcagtatcgcgaactgaccAAcCTGAAAAGCAC  
48HH40 AACGTAGCACCAACSCAGCAGTTCTGGAAGCCCTGCGTGAAGCACATCCGATTGTGGAaaaaattctgcagtatcgcgaactgaccAAcCTGAAAAGCAC  
48HH31 AACGTAGCACcCAACSCAGCAGTTCTGGAAGCCCTGCGTGAAGCACATCCGATTGTGGAaaaaattctgcagtatcgcgaactgaccAAcCTGAAAAGCAC  
48HH32 AACGTAGCACCAACSCAGCAGTTCTGGAAGCCCTGCGTGAAGCACATCCGATTGTGGAaaaaattctgcagtatcgcgaactgaccAAcCTGAAAAGCAC  
Clustal Consensus \*\*\*\*\* \*\*\*\*\*



```

      810           820           830           840           850           860           870           880           890           900
KTQ_pol  | .....|.....|.....|.....|.....|.....|.....|.....|.....|.....|.....|.....|.....|.....|.....|.....|.....|.....|.....|.....|.....
48HH35   | ctatatcgatccgctgccggatctgattcatcccggtaccgggtctgtgcatacccggttttaatacagaccgcaaccgcaaccgggtcgcctgagcagcagc
48HH33   | CTATATCGATCCGCTGCCGGATCTGATTCATCCGCGTACCGGTCGTCCTGCATACCCGTTTAAATCAGACCGCAACCGCAACCAGCTCGCCTGAGCAGCAGC
48HH47   | CTATATCGATCCGCTGCCGGATCTGATTCATCCGCGTACCGGTCGTCCTGCATACCCGTTTAAATCAGACCGCAACCGCAACCAGCTCGCCTGAGCAGCAGC
48HH45   | CTATATCGATCCGCTGCCGGATCTGATTCATCCGCGTACCGGTCGTCCTGCATACCCGTTTAAATCAGACCGCAACCGCAACCAGCTCGCCTGAGCAGCAGC
48HH36   | CTATATCGATCCGCTGCCGGATCTGATTCATCCGCGTACCGGTCGTCCTGCATACCCGTTTAAATCAGACCGCAACCGCAACCAGCTCGCCTGAGCAGCAGC
48HH38   | CTATATCGATCCGCTGCCGGATCTGATTCATCCGCGTACCGGTCGTCCTGCATACCCGTTTAAATCAGACCGCAACCGCAACCAGCTCGCCTGAGCAGCAGC
48HH44   | CTATATCGATCCGCTGCCGGATCTGATTCATCCGCGTACCGGTCGTCCTGCATACCCGTTTAAATCAGACCGCAACCGCAACCAGCTCGCCTGAGCAGCAGC
48HH39   | CTATATCGATCCGCTGCCGGATCTGATTCATCCGCGTACCGGTCGTCCTGCATACCCGTTTAAATCAGACCGCAACCGCAACCAGCTCGCCTGAGCAGCAGC
48HH29   | CTATATCGATCCGCTGCCGGATCTGATTCATCCGCGTACCGGTCGTCCTGCATACCCGTTTAAATCAGACCGCAACCGCAACCAGCTCGCCTGAGCAGCAGC
48HH46   | CTATATCGATCCGCTGCCGGATCTGATTCATCCGCGTACCGGTCGTCCTGCATACCCGTTTAAATCAGACCGCAACCGCAACCAGCTCGCCTGAGCAGCAGC
48HH28   | CTATATCGATCCGCTGCCGGATCTGATTCATCCGCGTACCGGTCGTCCTGCATACCCGTTTAAATCAGACCGCAACCGCAACCAGCTCGCCTGAGCAGCAGC
48HH30   | CTATATCGATCCGCTGCCGGATCTGATTCATCCGCGTACCGGTCGTCCTGCATACCCGTTTAAATCAGACCGCAACCGCAACCAGCTCGCCTGAGCAGCAGC
48HH37   | CTATATCGATCCGCTGCCGGATCTGATTCATCCGCGTACCGGTCGTCCTGCATACCCGTTTAAATCAGACCGCAACCGCAACCAGCTCGCCTGAGCAGCAGC
48HH34   | CTATATCGATCCGCTGCCGGATCTGATTCATCCGCGTACCGGTCGTCCTGCATACCCGTTTAAATCAGACCGCAACCGCAACCAGCTCGCCTGAGCAGCAGC
48HH40   | CTATATCGATCCGCTGCCGGATCTGATTCATCCGCGTACCGGTCGTCCTGCATACCCGTTTAAATCAGACCGCAACCGCAACCAGCTCGCCTGAGCAGCAGC
48HH31   | CTATATCGATCCGCTGCCGGATCTGATTCATCCGCGTACCGGTCGTCCTGCATACCCGTTTAAATCAGACCGCAACCGCAACCAGCTCGCCTGAGCAGCAGC
48HH32   | CTATATCGATCCGCTGCCGGATCTGATTCATCCGCGTACCGGTCGTCCTGCATACCCGTTTAAATCAGACCGCAACCGCAACCAGCTCGCCTGAGCAGCAGC
Clustal Consensus * * * * * * * * * * * * * * * * * * * * * * * * * * * * * * * * * * * * * * * * * * * * * * * * * * * * * * * *

```

A570 (GCA)

```

      910           920           930           940           950           960           970           980           990           1000
KTQ_pol  | .....|.....|.....|.....|.....|.....|.....|.....|.....|.....|.....|.....|.....|.....|.....|.....|.....|.....|.....|.....
48HH35   | gatccgaactctgcagaatattccggttcgtacaccgctgggtcagcgtattcgtcgtgcatattattgcagaagaaggttggctgctggttgactggatt
48HH33   | GGTCCGAATCTGCAGAATATTCCGGTTCGTACACCGCTGGGTCAGCGTATTCGTCGTGCATTTATTGCAGAAGAAGGTTGGCTGCTGGTTGCACTGGATT
48HH47   | GATCCGAATCTGCAGAATATTCCGGTTCGTACACCGCTGGGTCAGCGTATTCGTCGTGCATTTATTGCAGAAGAAGGTTGGCTGCTGGTTGCACTGGATT
48HH45   | GATCCGAATCTGCAGAATATTCCGGTTCGTACACCGCTGGGTCAGCGTATTCGTCGTGCATTTATTGCAGAAGAAGGTTGGCTGCTGGTTGCACTGGATT
48HH36   | GATCCGAATCTGCAGAATATTCCGGTTCGTACACCGCTGGGTCAGCGTATTCGTCGTGCATTTATTGCAGAAGAAGGTTGGCTGCTGGTTGCACTGGATT
48HH38   | GATCCGAATCTGCAGAATATTCCGGTTCGTACACCGCTGGGTCAGCGTATTCGTCGTGCATTTATTGCAGAAGAAGGTTGGCTGCTGGTTGCACTGGATT
48HH44   | GATCCGAATCTGCAGAATATTCCGGTTCGTACACCGCTGGGTCAGCGTATTCGTCGTGCATTTATTGCAGAAGAAGGTTGGCTGCTGGTTGCACTGGATT
48HH39   | GGTCCGAATCTGCAGAATATTCCGGTTCGTACACCGCTGGGTCAGCGTATTCGTCGTGCATTTATTGCAGAAGAAGGTTGGCTGCTGGTTGCACTGGATT
48HH29   | GGTCCGAATCTGCAGAATATTCCGGTTCGTACACCGCTGGGTCAGCGTATTCGTCGTGCATTTATTGCAGAAGAAGGTTGGCTGCTGGTTGCACTGGATT
48HH46   | GGTCCGAATCTGCAGAATATTCCGGTTCGTACACCGCTGGGTCAGCGTATTCGTCGTGCATTTATTGCAGAAGAAGGTTGGCTGCTGGTTGCACTGGATT
48HH28   | GGTCCGAATCTGCAGAATATTCCGGTTCGTACACCGCTGGGTCAGCGTATTCGTCGTGCATTTATTGCAGAAGAAGGTTGGCTGCTGGTTGCACTGGATT
48HH30   | GATCCGAATCTGCAGAATATTCCGGTTCGTACACCGCTGGGTCAGCGTATTCGTCGTGCATTTATTGCAGAAGAAGGTTGGCTGCTGGTTGCACTGGATT
48HH37   | GAAACCGAATCTGCAGAATATTCCGGTTCGTACACCGCTGGGTCAGCGTATTCGTCGTGCATTTATTGCAGAAGAAGGTTGGCTGCTGGTTGCACTGGATT
48HH34   | GATCCGAATCTGCAGAATATTCCGGTTCGTACACCGCTGGGTCAGCGTATTCGTCGTGCATTTATTGCAGAAGAAGGTTGGCTGCTGGTTGCACTGGATT
48HH40   | GAAACCGAATCTGCAGAATATTCCGGTTCGTACACCGCTGGGTCAGCGTATTCGTCGTGCATTTATTGCAGAAGAAGGTTGGCTGCTGGTTGCACTGGATT
48HH31   | GATCCGAATCTGCAGAATATTCCGGTTCGTACACCGCTGGGTCAGCGTATTCGTCGTGCATTTATTGCAGAAGAAGGTTGGCTGCTGGTTGCACTGGATT
48HH32   | GATCCGAATCTGCAGAATATTCCGGTTCGTACACCGCTGGGTCAGCGTATTCGTCGTGCATTTATTGCAGAAGAAGGTTGGCTGCTGGTTGCACTGGATT
Clustal Consensus * * * * * * * * * * * * * * * * * * * * * * * * * * * * * * * * * * * * * * * * * * * *

```

D578 (GAT)

V586 (GTT)



Ile614 (ATA) 1010 1020 1030 1040 1050 1060 1070 1080 1090 1100 H639 (CAT)

KTQ\_pol atagccagatagaactgcggtgttctggcccattctgagcgggtgatgaaaatctgattcgcggttttcaggaaggctcgcgatattcataccgaaaccgcaag  
 48HH35 ATAGCCAGATGSAACTGCGTGTTCCTGGCCCATCTGAGCGGTGATGAAAATCTGATTCGCGTGTTCAGGAAGGTCGCGATATTACCACCGAAACCGCAAG  
 48HH33 ATAGCCAGATGSAACTGCGTGTTCCTGGCCCATCTGAGCGGTGATGAAAATCTGATTCGCGTGTTCAGGAAGGTCGCGATATTACACCGAAACCGCAAG  
 48HH47 ATAGCCAGATGSAACTGCGTGTTCCTGGCCCATCTGAGCGGTGATGAAAATCTGATTCGCGTGTTCAGGAAGGTCGCGATATTACACCGAAACCGCAAG  
 48HH45 ATAGCCAGATGSAACTGCGTGTTCCTGGCCCATCTGAGCGGTGATGAAAATCTGATTCGCGTGTTCAGGAAGGTCGCGATATTACACCGAAACCGCAAG  
 48HH36 ATAGCCAGATGSAACTGCGTGTTCCTGGCCCATCTGAGCGGTGATGAAAATCTGATTCGCGTGTTCAGGAAGGTCGCGATATTACACCGAAACCGCAAG  
 48HH38 ATAGCCAGATGSAACTGCGTGTTCCTGGCCCATCTGAGCGGTGATGAAAATCTGATTCGCGTGTTCAGGAAGGTCGCGATATTACACCGAAACCGCAAG  
 48HH44 ATAGCCAGATGSAACTGCGTGTTCCTGGCCCATCTGAGCGGTGATGAAAATCTGATTCGCGTGTTCAGGAAGGTCGCGATATTACACCGAAACCGCAAG  
 48HH39 ATAGCCAGAAAASAACTGCGTGTTCCTGGCCCATCTGAGCGGTGATGAAAATCTGATTCGCGTGTTCAGGAAGGTCGCGATATTACACCGAAACCGCAAG  
 48HH29 ATAGCCAGATGSAACTGCGTGTTCCTGGCCCATCTGAGCGGTGATGAAAATCTGATTCGCGTGTTCAGGAAGGTCGCGATATTACACCGAAACCGCAAG  
 48HH46 ATAGCCAGAAAASAACTGCGTGTTCCTGGCCCATCTGAGCGGTGATGAAAATCTGATTCGCGTGTTCAGGAAGGTCGCGATATTACACCGAAACCGCAAG  
 48HH28 ATAGCCAGATGSAACTGCGTGTTCCTGGCCCATCTGAGCGGTGATGAAAATCTGATTCGCGTGTTCAGGAAGGTCGCGATATTACACCGAAACCGCAAG  
 48HH30 ATAGCCAGAAAASAACTGCGTGTTCCTGGCCCATCTGAGCGGTGATGAAAATCTGATTCGCGTGTTCAGGAAGGTCGCGATATTACACCGAAACCGCAAG  
 48HH37 ATAGCCAGATGSAACTGCGTGTTCCTGGCCCATCTGAGCGGTGATGAAAATCTGATTCGCGTGTTCAGGAAGGTCGCGATATTACACCGAAACCGCAAG  
 48HH40 ATAGCCAGATGSAACTGCGTGTTCCTGGCCCATCTGAGCGGTGATGAAAATCTGATTCGCGTGTTCAGGAAGGTCGCGATATTACACCGAAACCGCAAG  
 48HH31 ATAGCCAGATGSAACTGCGTGTTCCTGGCCCATCTGAGCGGTGATGAAAATCTGATTCGCGTGTTCAGGAAGGTCGCGATATTACACCGAAACCGCAAG  
 48HH32 ATAGCCAGAAAASAACTGCGTGTTCCTGGCCCATCTGAGCGGTGATGAAAATCTGATTCGCGTGTTCAGGAAGGTCGCGATATTACACCGAAACCGCAAG  
 Clustal Consensus \*\*\*\*\*

F667 (TTT) 1110 1120 1130 1140 1150 1160 1170 1180 1190 1200

KTQ\_pol ctggatgtttgggtttccgctgaagcagttgatccgctgatgctcgtgcagcaaaaaccattaattttggggtgctgtatgggatgagcgcacatcgt  
 48HH35 CTGGATGTTTGGTGTTCGCGTGAAGCAGTTGATCCGCTGATGCGTCGTGCAGCAAAAACCATTAAATTTGGGGTGTCTGATGGTATGAGCGCACATCGT  
 48HH33 CTGGATGTTTGGTGTTCGCGTGAAGCAGTTGATCCGCTGATGCGTCGTGCAGCAAAAACCATTAAATTTGGGGTGTCTGATGGTATGAGCGCACATCGT  
 48HH47 CTGGATGTTTGGTGTTCGCGTGAAGCAGTTGATCCGCTGATGCGTCGTGCAGCAAAAACCATTAAATTTGGGGTGTCTGATGGTATGAGCGCACATCGT  
 48HH45 CTGGATGTTTGGTGTTCGCGTGAAGCAGTTGATCCGCTGATGCGTCGTGCAGCAAAAACCATTAAATTTGGGGTGTCTGATGGTATGAGCGCACATCGT  
 48HH36 CTGGATGTTTGGTGTTCGCGTGAAGCAGTTGATCCGCTGATGCGTCGTGCAGCAAAAACCATTAAATTTGGGGTGTCTGATGGTATGAGCGCACATCGT  
 48HH38 CTGGATGTTTGGTGTTCGCGTGAAGCAGTTGATCCGCTGATGCGTCGTGCAGCAAAAACCATTAAATTTGGGGTGTCTGATGGTATGAGCGCACATCGT  
 48HH44 CTGGATGTTTGGTGTTCGCGTGAAGCAGTTGATCCGCTGATGCGTCGTGCAGCAAAAACCATTAAATTTGGGGTGTCTGATGGTATGAGCGCACATCGT  
 48HH39 CTGGATGTTTGGTGTTCGCGTGAAGCAGTTGATCCGCTGATGCGTCGTGCAGCAAAAACCATTAAATTTGGGGTGTCTGATGGTATGAGCGCACATCGT  
 48HH29 CTGGATGTTTGGTGTTCGCGTGAAGCAGTTGATCCGCTGATGCGTCGTGCAGCAAAAACCATTAAATTTGGGGTGTCTGATGGTATGAGCGCACATCGT  
 48HH46 CTGGATGTTTGGTGTTCGCGTGAAGCAGTTGATCCGCTGATGCGTCGTGCAGCAAAAACCATTAAATTTGGGGTGTCTGATGGTATGAGCGCACATCGT  
 48HH30 CTGGATGTTTGGTGTTCGCGTGAAGCAGTTGATCCGCTGATGCGTCGTGCAGCAAAAACCATTAAATTTGGGGTGTCTGATGGTATGAGCGCACATCGT  
 48HH37 CTGGATGTTTGGTGTTCGCGTGAAGCAGTTGATCCGCTGATGCGTCGTGCAGCAAAAACCATTAAATTTGGGGTGTCTGATGGTATGAGCGCACATCGT  
 48HH34 CTGGATGTTTGGTGTTCGCGTGAAGCAGTTGATCCGCTGATGCGTCGTGCAGCAAAAACCATTAAATTTGGGGTGTCTGATGGTATGAGCGCACATCGT  
 48HH40 CTGGATGTTTGGTGTTCGCGTGAAGCAGTTGATCCGCTGATGCGTCGTGCAGCAAAAACCATTAAATTTGGGGTGTCTGATGGTATGAGCGCACATCGT  
 48HH31 CTGGATGTTTGGTGTTCGCGTGAAGCAGTTGATCCGCTGATGCGTCGTGCAGCAAAAACCATTAAATTTGGGGTGTCTGATGGTATGAGCGCACATCGT  
 48HH32 CTGGATGTTTGGTGTTCGCGTGAAGCAGTTGATCCGCTGATGCGTCGTGCAGCAAAAACCATTAAATTTGGGGTGTCTGATGGTATGAGCGCACATCGT  
 Clustal Consensus \*\*\*\*\*



```

      1210      1220      1230      1240      1250      1260      1270      1280      1290      1300
KTQ_pol  ctgagccaggaactggcaattccgtacgaagaagcccaggcatttatcgaacgttattttcagagctttccgaaagtctgctgcctggattgaaaaaaccc
48HH35   CTGAGCCAGGAAC TGGCAATTCCGTACGAAGAAGCCCAGGCATTTATCGAACGTTATTTTCAGAGCTTTCCGAAAAGTTCGTGCCTGGATTGAAAAAACCC
48HH33   CTGAGCCAGGAAC TGGCAATTCCGTACGAAGAAGCCCAGGCATTTATCGAACGTTATTTTCAGAGCTTTCCGAAAAGTTCGTGCCTGGATTGAAAAAACCC
48HH47   CTGAGCCAGGAAC TGGCAATTCCGTACGAAGAAGCCCAGGCATTTATCGAACGTTATTTTCAGAGCTTTCCGAAAAGTTCGTGCCTGGATTGAAAAAACCC
48HH45   CTGAGCCAGGAAC TGGCAATTCCGTACGAAGAAGCCCAGGCATTTATCGAACGTTATTTTCAGAGCTTTCCGAAAAGTTCGTGCCTGGATTGAAAAAACCC
48HH36   CTGAGCCAGGAAC TGGCAATTCCGTACGAAGAAGCCCAGGCATTTATCGAACGTTATTTTCAGAGCTTTCCGAAAAGTTCGTGCCTGGATTGAAAAAACCC
48HH38   CTGAGCCAGGAAC TGGCAATTCCGTACGAAGAAGCCCAGGCATTTATCGAACGTTATTTTCAGAGCTTTCCGAAAAGTTCGTGCCTGGATTGAAAAAACCC
48HH44   CTGAGCCAGGAAC TGGCAATTCCGTACGAAGAAGCCCAGGCATTTATCGAACGTTATTTTCAGAGCTTTCCGAAAAGTTCGTGCCTGGATTGAAAAAACCC
48HH39   CTGAGCCAGGAAC TGGCAATTCCGTACGAAGAAGCCCAGGCATTTATCGAACGTTATTTTCAGAGCTTTCCGAAAAGTTCGTGCCTGGATTGAAAAAACCC
48HH46   CTGAGCCAGGAAC TGGCAATTCCGTACGAAGAAGCCCAGGCATTTATCGAACGTTATTTTCAGAGCTTTCCGAAAAGTTCGTGCCTGGATTGAAAAAACCC
48HH28   CTGAGCCAGGAAC TGGCAATTCCGTACGAAGAAGCCCAGGCATTTATCGAACGTTATTTTCAGAGCTTTCCGAAAAGTTCGTGCCTGGATTGAAAAAACCC
48HH30   CTGAGCCAGGAAC TGGCAATTCCGTACGAAGAAGCCCAGGCATTTATCGAACGTTATTTTCAGAGCTTTCCGAAAAGTTCGTGCCTGGATTGAAAAAACCC
48HH37   CTGAGCCAGGAAC TGGCAATTCCGTACGAAGAAGCCCAGGCATTTATCGAACGTTATTTTCAGAGCTTTCCGAAAAGTTCGTGCCTGGATTGAAAAAACCC
48HH34   CTGAGCCAGGAAC TGGCAATTCCGTACGAAGAAGCCCAGGCATTTATCGAACGTTATTTTCAGAGCTTTCCGAAAAGTTCGTGCCTGGATTGAAAAAACCC
48HH40   CTGAGCCAGGAAC TGGCAATTCCGTACGAAGAAGCCCAGGCATTTATCGAACGTTATTTTCAGAGCTTTCCGAAAAGTTCGTGCCTGGATTGAAAAAACCC
48HH31   CTGAGCCAGGAAC TGGCAATTCCGTACGAAGAAGCCCAGGCATTTATCGAACGTTATTTTCAGAGCTTTCCGAAAAGTTCGTGCCTGGATTGAAAAAACCC
48HH32   CTGAGCCAGGAAC TGGCAATTCCGTACGAAGAAGCCCAGGCATTTATCGAACGTTATTTTCAGAGCTTTCCGAAAAGTTCGTGCCTGGATTGAAAAAACCC
Clustal Consensus *****

```

```

      1310      1320      1330      1340      1350      1360      1370      1380      1390      1400
KTQ_pol  tggagaaggctcgtcgtcgcgggttatggtgaaacctgttggcgtcgtcgttatgttccggatctggaagcacgtgttaaaagcgttccgtgaaacagc
48HH35   TGGAGAAGGTCGTCGTCGCGGTTATGTTGAAACCCGTGTTGGTCGTCGTCGTTATGTTCCGGATCTGGAAGCACGTGTTAAAAGCGTTCGTGAAGCAGC
48HH33   TGGAGAAGGTCGTCGTCGCGGTTATGTTGAAACCCGTGTTGGTCGTCGTCGTTATGTTCCGGATCTGGAAGCACGTGTTAAAAGCGTTCGTGAAGCAGC
48HH47   TGGAGAAGGTCGTCGTCGCGGTTATGTTGAAACCCGTGTTGGTCGTCGTCGTTATGTTCCGGATCTGGAAGCACGTGTTAAAAGCGTTCGTGAAGCAGC
48HH45   TGGAGAAGGTCGTCGTCGCGGTTATGTTGAAACCCGTGTTGGTCGTCGTCGTTATGTTCCGGATCTGGAAGCACGTGTTAAAAGCGTTCGTGAAGCAGC
48HH36   TGGAGAAGGTCGTCGTCGCGGTTATGTTGAAACCCGTGTTGGTCGTCGTCGTTATGTTCCGGATCTGGAAGCACGTGTTAAAAGCGTTCGTGAAGCAGC
48HH44   TGGAGAAGGTCGTCGTCGCGGTTATGTTGAAACCCGTGTTGGTCGTCGTCGTTATGTTCCGGATCTGGAAGCACGTGTTAAAAGCGTTCGTGAAGCAGC
48HH39   TGGAGAAGGTCGTCGTCGCGGTTATGTTGAAACCCGTGTTGGTCGTCGTCGTTATGTTCCGGATCTGGAAGCACGTGTTAAAAGCGTTCGTGAAGCAGC
48HH29   TGGAGAAGGTCGTCGTCGCGGTTATGTTGAAACCCGTGTTGGTCGTCGTCGTTATGTTCCGGATCTGGAAGCACGTGTTAAAAGCGTTCGTGAAGCAGC
48HH46   TGGAGAAGGTCGTCGTCGCGGTTATGTTGAAACCCGTGTTGGTCGTCGTCGTTATGTTCCGGATCTGGAAGCACGTGTTAAAAGCGTTCGTGAAGCAGC
48HH28   TGGAGAAGGTCGTCGTCGCGGTTATGTTGAAACCCGTGTTGGTCGTCGTCGTTATGTTCCGGATCTGGAAGCACGTGTTAAAAGCGTTCGTGAAGCAGC
48HH30   TGGAGAAGGTCGTCGTCGCGGTTATGTTGAAACCCGTGTTGGTCGTCGTCGTTATGTTCCGGATCTGGAAGCACGTGTTAAAAGCGTTCGTGAAGCAGC
48HH37   TGGAGAAGGTCGTCGTCGCGGTTATGTTGAAACCCGTGTTGGTCGTCGTCGTTATGTTCCGGATCTGGAAGCACGTGTTAAAAGCGTTCGTGAAGCAGC
48HH34   TGGAGAAGGTCGTCGTCGCGGTTATGTTGAAACCCGTGTTGGTCGTCGTCGTTATGTTCCGGATCTGGAAGCACGTGTTAAAAGCGTTCGTGAAGCAGC
48HH40   TGGAGAAGGTCGTCGTCGCGGTTATGTTGAAACCCGTGTTGGTCGTCGTCGTTATGTTCCGGATCTGGAAGCACGTGTTAAAAGCGTTCGTGAAGCAGC
48HH31   TGGAGAAGGTCGTCGTCGCGGTTATGTTGAAACCCGTGTTGGTCGTCGTCGTTATGTTCCGGATCTGGAAGCACGTGTTAAAAGCGTTCGTGAAGCAGC
48HH32   TGGAGAAGGTCGTCGTCGCGGTTATGTTGAAACCCGTGTTGGTCGTCGTCGTTATGTTCCGGATCTGGAAGCACGTGTTAAAAGCGTTCGTGAAGCAGC
Clustal Consensus *****

```



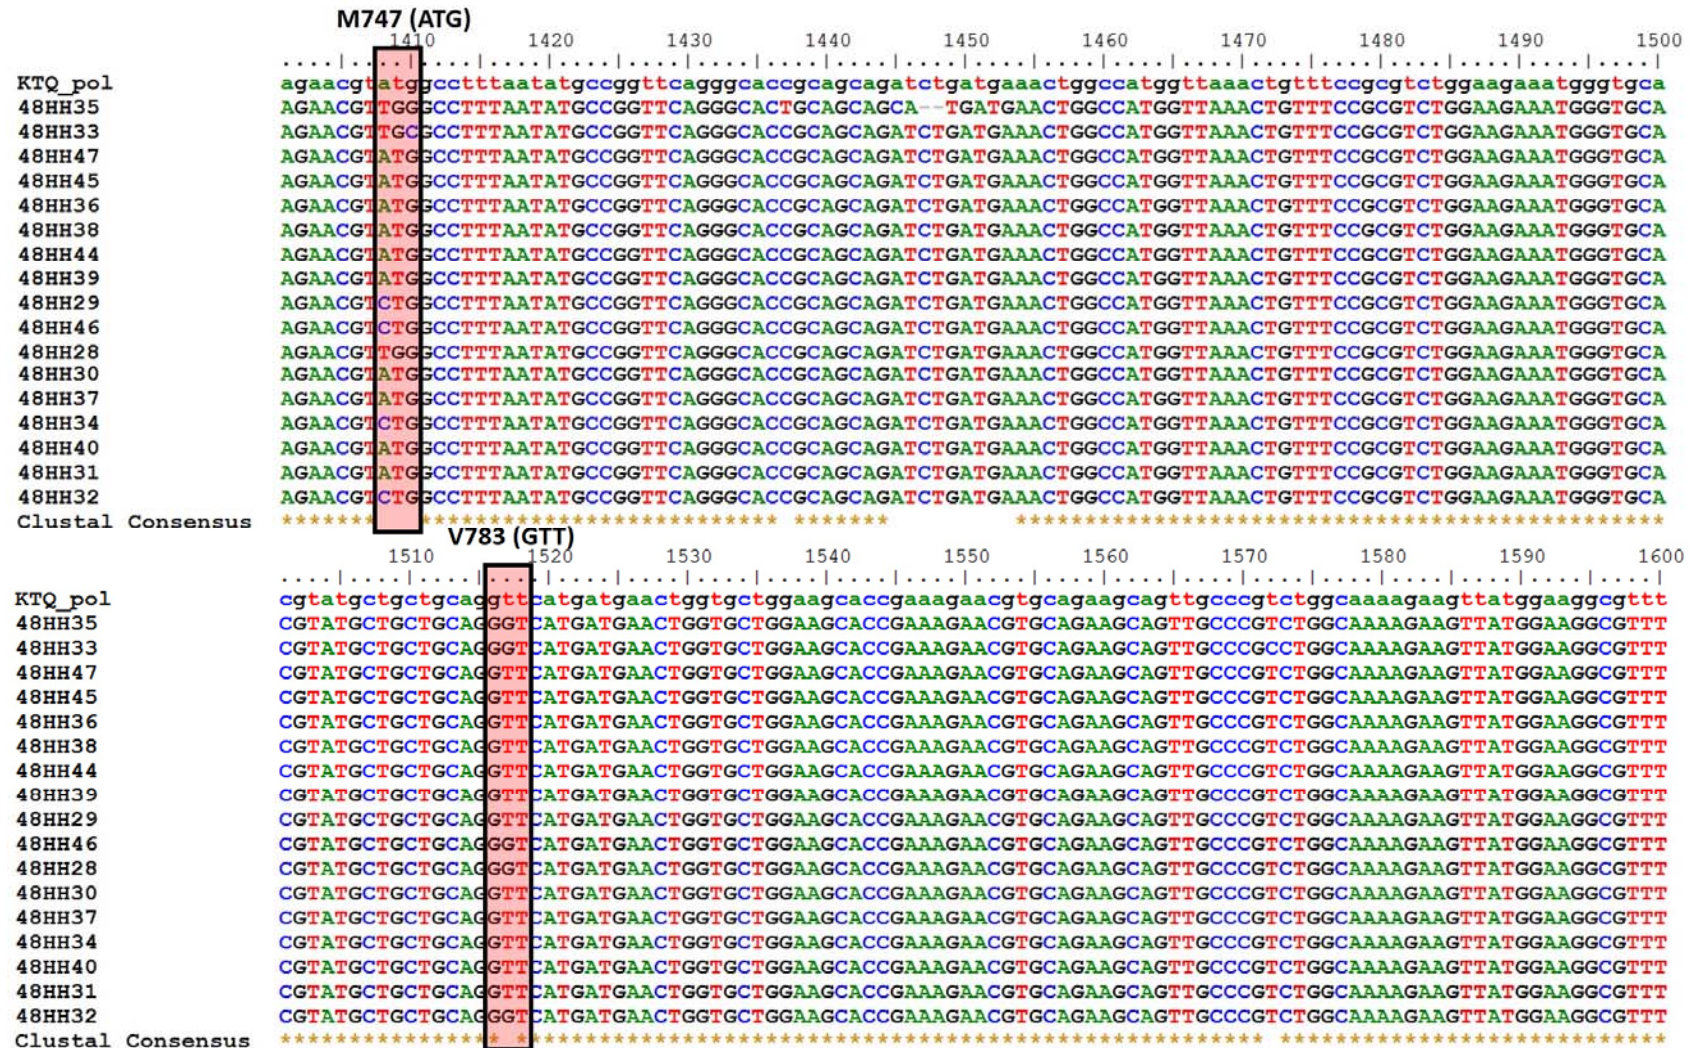

**Figure S2.**

Multiple sequence alignment of random 20 clones from the combinatorial library constructed through shuffling of 173 PCR active mutants. Wild type KlenTaq DNA polymerase nucleotide sequence was also included in alignment. The mutational positions are labelled in single letter notation of amino acids with their respective wild type codons in brackets. Black solid line boxes with red shade highlights the change of codons in respective clones. Note all the positions got shuffled even for positions H639 and F667 with less number of active mutants. Ruler in the alignment is arbitrary number.

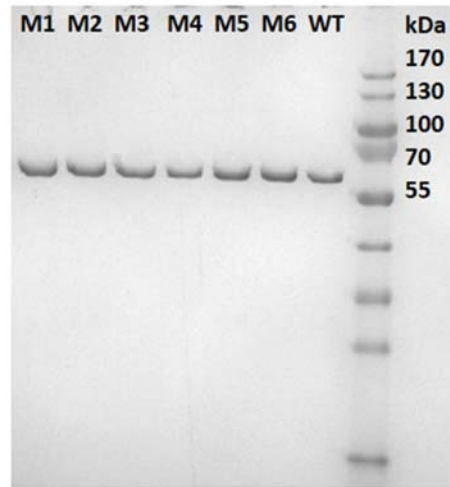

**Figure S3.**

SDS-PAGE gel of affinity purified wild type KlenTaq DNA polymerase and selected positive hits from allelic discrimination screening. Mutants were labelled as M1, M2, M3, M4, M5, M6 and wild type KlenTaq DNA polymerase as WT.



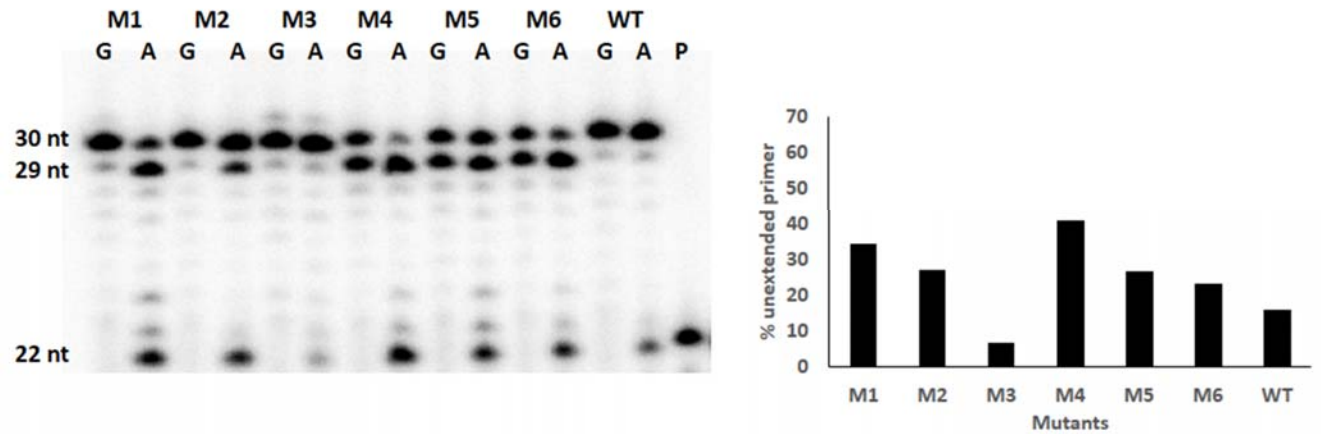

**Figure S4.**

Primer extension assay of selected mutants purified to homogeneity along with wild type KlenTaq DNA polymerase. Mutants were labelled as M1, M2, M3, M4, M5, M6 and wild type KlenTaq DNA polymerase as WT. 30nM purified enzymes were applied in matched (G) and mismatched (A) reaction containing 100 $\mu$ M dNTPs in 1X KlenTaq reaction buffer and the primer extension was stopped after 10min (Left). Plot showing the percentage of mismatched (A) primer remain unextended in mismatch primer template reaction. Among mutants tested, mutant M4 had 40% of mismatch primer remained unextended whereas WT had only 16% primer unextended. M4 was characterized further and named as Mut\_ADL (Right).

10 20 30 40 50 60 70 80 90 100  
Mut\_ADL\_H2 aTGAgAGGatCTcaCCATCACCATCaCCATACGGATCCGCATGCAGCACTGGAAGAAGCACCTTGGCCTCCGCCTGAAGGTGCATTGTGGTTTGTTC  
KTQ\_pol atgagaggatctcaaccatcaccatcaccatacggatccgcatgcagcactggaagaagcaccttggcctccgcctgaagggtgcatcttggtttggtttc  
Clustal Consensus \*\*\*\*\*

110 120 130 140 150 160 170 180 190 200  
Mut\_ADL\_H2 TGAGCCGTAAAGAACCAGTGTGGGCAGATCTGCTGGCACTGGCAGCAGCACGTGGTGGTCGTGTTTCATCGTGCACCCGAACCGTATAAAGCTCTGCCGGA  
KTQ\_pol tgagccgtaaagaaccgatgtgggcagatctgctggcactggcagcagcagctgggtggtcgtgtttcatcgtgcaccggaaccgtataaagctctgcccga  
Clustal Consensus \*\*\*\*\*

210 220 230 240 250 260 270 280 290 300  
Mut\_ADL\_H2 TCTGAAAGAAGCACGGCTCTGCTGGCAAAAGATCTGAGCGTTCTGGCACTGCGTGAAGGTCTGGGACTGCCCTCCGGGTGATGATCCGATGCTGCTGGCA  
KTQ\_pol tctgaaagaagcacgctctgctggcaaaagatctgagcgttctggcactgctggaaggtcctgggactgcctccgggtgatgatccgatgctgctggca  
Clustal Consensus \*\*\*\*\*

310 320 330 340 350 360 370 380 390 400  
Mut\_ADL\_H2 TATCTGCTGGATCCGAGCAATACCACACCCGGAAGGTGTTGCACGTCGTTATGGTGGTGAATGGACCGAAGAAGCAGGCCAACGCGCAGCACTGAGCCGAA  
KTQ\_pol tatctgctggatccgagcaataccacaccggaaggtgttgacgctcgttatgggtggaatggaccgaagaagcaggcgaacgcccagcactgagcgaac  
Clustal Consensus \*\*\*\*\*

410 420 430 440 450 460 470 480 490 500  
Mut\_ADL\_H2 GTCGTTTTGCAAACTCTGTGGGGTCGTCTGGAAGGTGAAGAAGCTCTGCTGTGGCTGTATCGTGAAGTTGAACGTCGCCGTCTGCAGTTCTGGCACACAT  
KTQ\_pol gtcgttttgcAAACTctgtggggtcgtctggaaggtgaagaacgctctgctgtggctgtatcgtgaaagtgaacgtcccgtgtctgcagtcttggcacacat  
Clustal Consensus \*\*\*\*\*

510 520 530 540 550 560 570 580 590 600  
Mut\_ADL\_H2 GGAAGCAACCGGTGTTCTGCTGGATGTTGCATATCTGCCGTGCACTGAGCCTGGAAGTTGCAGAAGAAATTCACGTCCTGGAAGCAGAAGTTTTCTGCTCTG  
KTQ\_pol ggaagcaaccgggtttcgtctggatgttgcatatctgctgcaactgagcctggaagttgcagaagaaattgcagctctggaagcagaagttttctgtctg  
Clustal Consensus \*\*\*\*\*

610 620 630 640 650 660 670 680 690 700  
Mut\_ADL\_H2 GCCGGCCATCCGTTTAAACTGAATAGCCGTGATCAGCTGGAACGTGTTCTGTTTGATGAACCTGGGTCCTGCCAGCAATTGGTAAACCAAAAAACCAGTA  
KTQ\_pol gcaggccatccgttttaactggaatagccgtgatcagctggaacgtgttctgtttgatgaactgggtctgccagcaattggtataaacgaaaaaccggtta  
Clustal Consensus \*\*\*\*\* N483 E507 \*\*\*\*\*

710 720 730 740 750 760 770 780 790 800  
Mut\_ADL\_H2 AACGTAGcACCAACGCAGCAGTTCTGGAAGCCCTGCCGTGAAGCACATCCGATTGTGGAAGAAAATTCGCAGTATCGCGAAGTGAACGGTCTGAAAAGCAC  
KTQ\_pol aacgttagcaccagcagcagttctggaagccctgctggaagcacatccgattgtggaagaaaattctgcagtatcgcggaactgaccgaaatgaaaagcac  
Clustal Consensus \*\*\*\*\* S515 K540 \*\*\*\*\*



810 820 830 840 850 860 870 **A570** 880 890 900  
Mut\_ADL\_H2 CTATATCGATCCGCTGCCGGATCTGATTCATCCGCGTACCGGTCTGCTGCATACCGTTTTAATCAGACCGCAACCGAAACCGGTCGCCTGAGCAGCAGC  
KTQ\_pol1 ctatatcgatccgctgccggatctgattcatccgcgtaccggctcgtctgcatacccgttttaatcagaccgcaaccgcaaccggtcgcctgagcagcagc  
Clustal Consensus \*\*\*\*\*

**D578** 910 920 **V586** 930 940 950 960 970 980 990 1000  
Mut\_ADL\_H2 GGTCCGAATCTGCAGAAATATCCGGTCTACACCGCTGGGTACAGCGTATTCGTCGTGCATTTATTGCAGAAGAGGTTGGCTGCTGGTTGCACTGGATT  
KTQ\_pol1 gatccgaatctgcagaatattccggctgtacaccgcgtgggtcagcgtattcgtctgcatatttcgagaagaaggttggctgctggttgcaactggatt  
Clustal Consensus \*\*\*\*\*

**I614** 1010 1020 1030 1040 1050 1060 1070 1080 1090 1100  
Mut\_ADL\_H2 ATAGCCAGATGGAACCTGCGTGTTCCTGCCCATCTGAGCGGTGATGAAAACTGATTCCGGTGTTCAGGAAGGTCGCGATATTCATACCGAAACCGCAAG  
KTQ\_pol1 atagccagataggaactgcgctgttctggcccatctgagcgggatgaaaaactgattcgcgtgtttcaggaaggtcgcgatattcataccgaaaccgcaag  
Clustal Consensus \*\*\*\*\*

1110 1120 1130 1140 1150 1160 1170 1180 1190 1200  
Mut\_ADL\_H2 CTGGATGTTTGGTGTTCGCGTGAAGCAGTTGATCCGCTGATGCGTGCAGCAAAAACCATTAATTTTGGGGTGCTGTATGGTATGAGCCGACATCGT  
KTQ\_pol1 ctggatgtttgggtgttcgcgctgaagcagttgatccgctgagcgtcgcagcaaaaaccattattttgggggtgctgtatgggtatgagcgcacatcgt  
Clustal Consensus \*\*\*\*\*

1210 1220 1230 1240 1250 1260 1270 1280 1290 1300  
Mut\_ADL\_H2 CTGAGCCAGGAACCTGGCAATTCCTACGAAGAAGCCAGGCCATTATCGAACGTTATTTTCAGAGCTTTCGAAAGTTCGTGCCTGGATTGAAAAAACC  
KTQ\_pol1 ctgagccaggaactggcaattccgtacgaagaagccaggcatttatcgaacgttattttcagagctttccgaaagttcgtgcctggaattgaaaaaacc  
Clustal Consensus \*\*\*\*\*

1310 1320 1330 1340 1350 1360 1370 1380 1390 1400  
Mut\_ADL\_H2 TGAAGAAGGTCGTCGTCGCGTTATGTTGAAACCTGTTTGGTCTGTCGTATTATGTTCCGGATCTGGAAGCACGTTTAAAGCGTTCGTGAAGCAGC  
KTQ\_pol1 tgaagaaggctcgtcgtcgcggttatgttgaaccctgtttggctcgtcgtcgttatgtttccggatctcgtgaagcacggtttaaagcgttcgtgaagcagc  
Clustal Consensus \*\*\*\*\*

1410 1420 1430 1440 1450 1460 1470 1480 1490 1500  
Mut\_ADL\_H2 AGAACGTATGGCCCTTAAATATGCCGGTTCAGGGCACCGCAGCAGATCTGATGAAACTGGCCATGGTTAAACTGTTTCGCGCTCTGGAAGAAATGGGTGCA  
KTQ\_pol1 agaacgtatggccctttaaataatgccggttcagggcacccgcagcagatctgatgaaactggccatggtttaaactgtttccgctctggaagaaatgggtgca  
Clustal Consensus \*\*\*\*\*

```

      1510      1520      1530      1540      1550      1560      1570      1580      1590      1600
Mut_ADL_H2  CGTATGCTGCTGCAGGTTCATGATGAACTGGTGCTGGAAGCCCGAAAGAACGTGCAGAAGCAGTTGCCCGCTGGCAAAGAAGTATGGAAGGCGTTT
KTQ_pol    cgtatgctgctgcaggttcatgatgaactggtgctggaagcaccgaaagaacgtgcagaagcagttgcccgtctggcaaaagaagttatggaaggcgtt
Clustal Consensus *****
      1610      1620      1630      1640      1650      1660      1670
Mut_ADL_H2  ACCGCTGGCAGTTCCGCTGGAAGTTGAAGTTGGTATTGGTGAAGATTGGCTGCTGCaAAAGaAtaaaA
KTQ_pol    accgctggcagttccgctggaagttgaagttggtattggtgaagattggctgtctgcaaaagaa-----
Clustal Consensus *****

```

**Figure S5.**

Multiple sequence alignment of wild type KlenTaq DNA polymerase and Mut\_ADL. The difference in nucleotide sequence at the target sites are marked in red box with solid black line. The position of target residues that got mutated were marked above the red boxes. The numbering in alignment ruler are arbitrary.



A

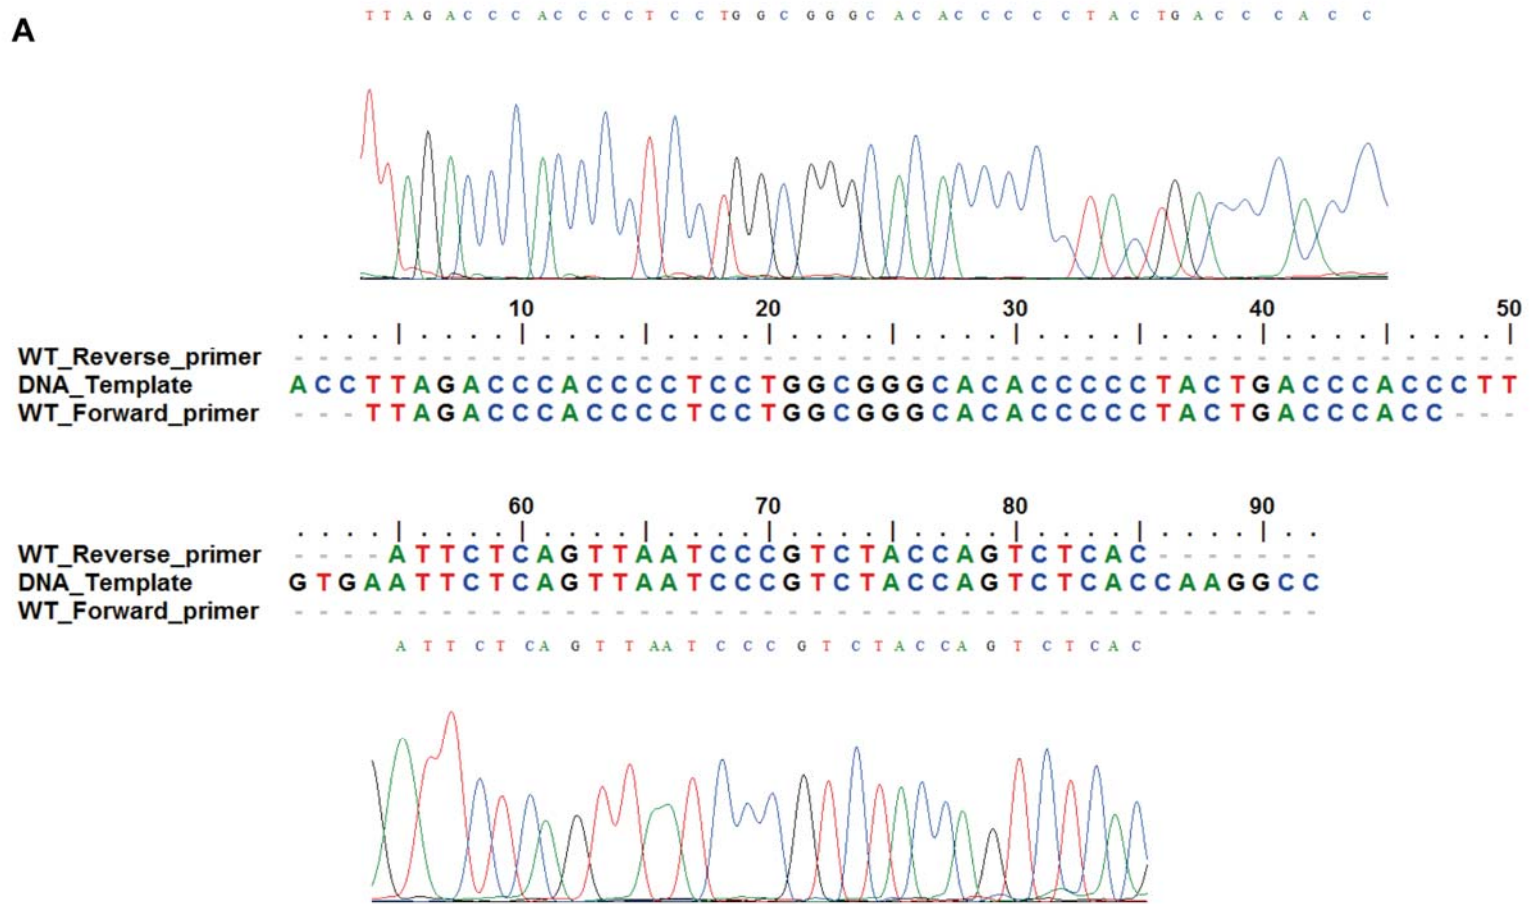

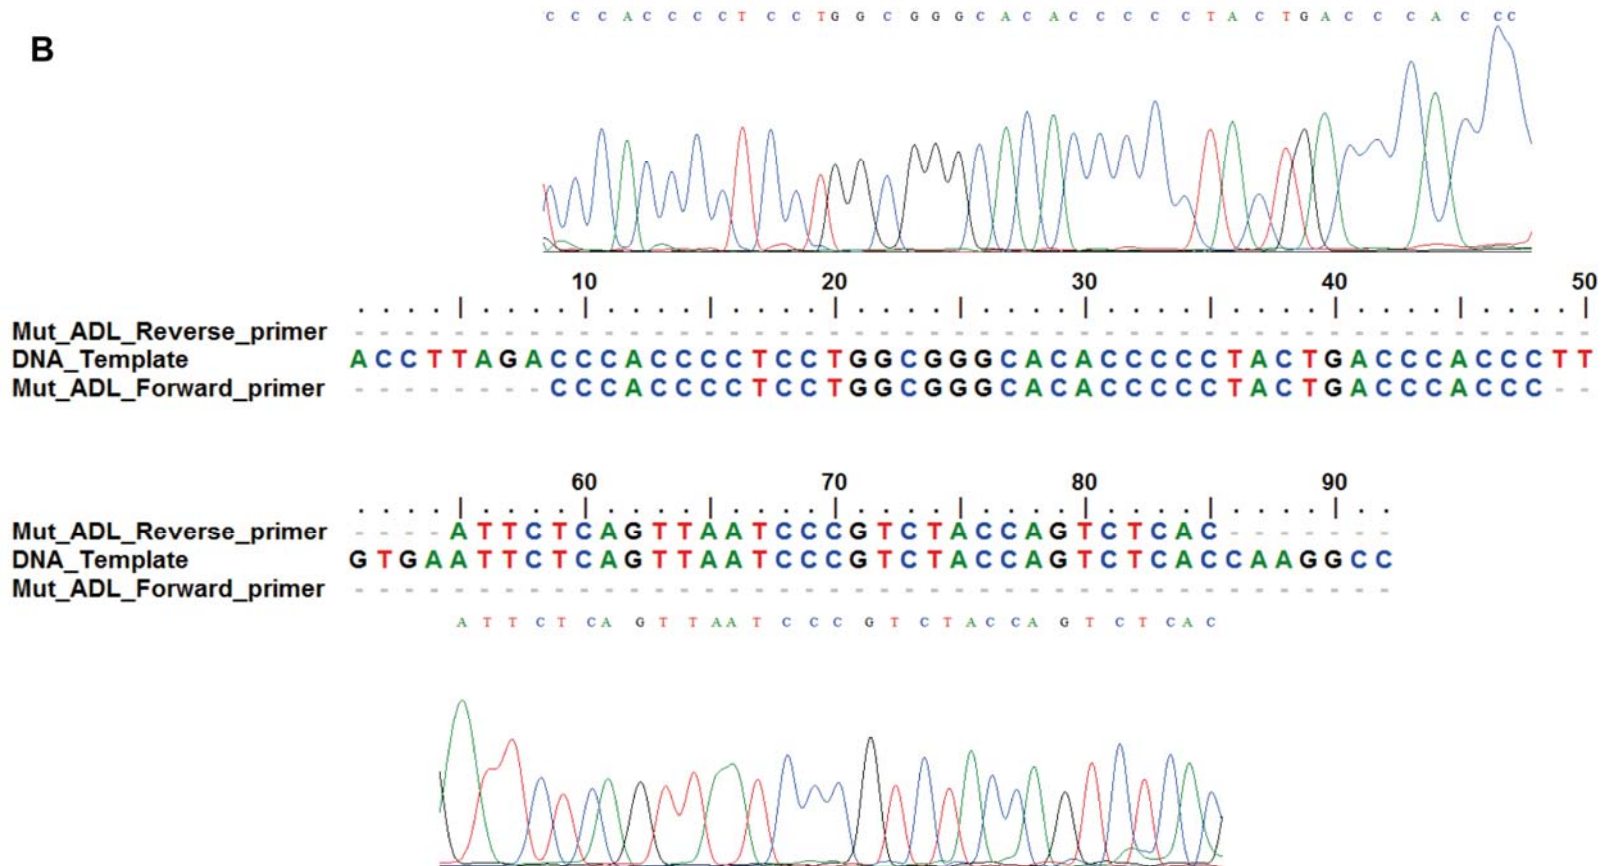

**Figure S6. Sanger sequencing analysis of amplified products.** The products that were amplified by respective enzymes (WT, Mut\_ADL and Mut\_RT) were presented in sequence alignment. Section of electropherogram of sequencing reactions with forward primer [5'-d(CTT GGT GAG ACT GGT AGA CG)-3'] (above sequence alignment) and reverse primer [5'-d(TTA GAC CCA CCC CTC CTG GCG)-3'] (below sequence alignment) respectively were shown. A) WT – Amplificate from DNA dependent DNA synthesis B) Mut\_ADL - Amplificate from DNA dependent DNA synthesis.

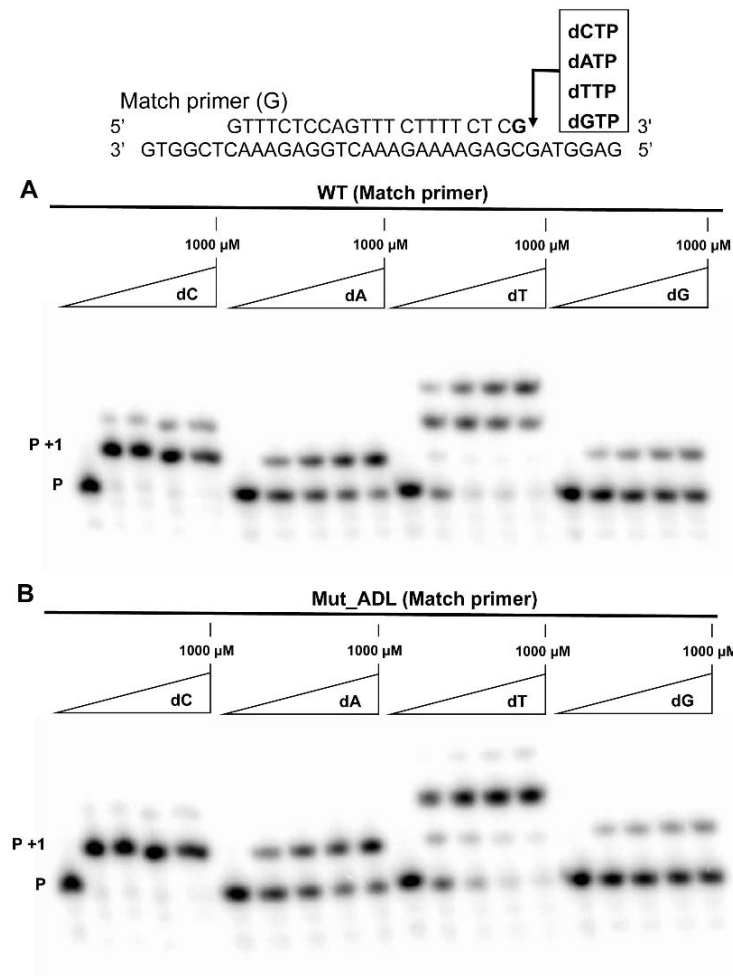

**Figure S7.** Single nucleotide misinsertion assay for wild type KlenTaq DNA polymerase and Mut\_ADL. The reaction (20  $\mu$ l) contained 1X KlenTaq reaction buffer, 250 nM template (5'-d(GAG GTA GCG AGA AAA GAA ACT GGA GAA ACT CGG TG)3'), 150 nM of 5' radioactively labelled Match primer (5'-d(GTT TCT CCA GTT TCT TTT CTC G)3'). After pre-incubation at 95°C for 2 min, the reaction mixture was cooled to 55°C. The reaction was performed in presence of 10 nM of enzyme and individual all four nucleotides (0, 200, 400, 600, 1000  $\mu$ M). The reactions were allowed to proceed for 10 min and terminated with 2 volumes of stopping solution (80% [v/v] formamide, 20 mM EDTA, 0.25% [w/v] bromophenol blue, 0.25% [w/v] xylene cyanol). 'P' indicates the unextended primer and 'P + 1' denotes the primer extended by one nucleotide, and so forth. Full-length gel is given in Supplementary Fig. S18.



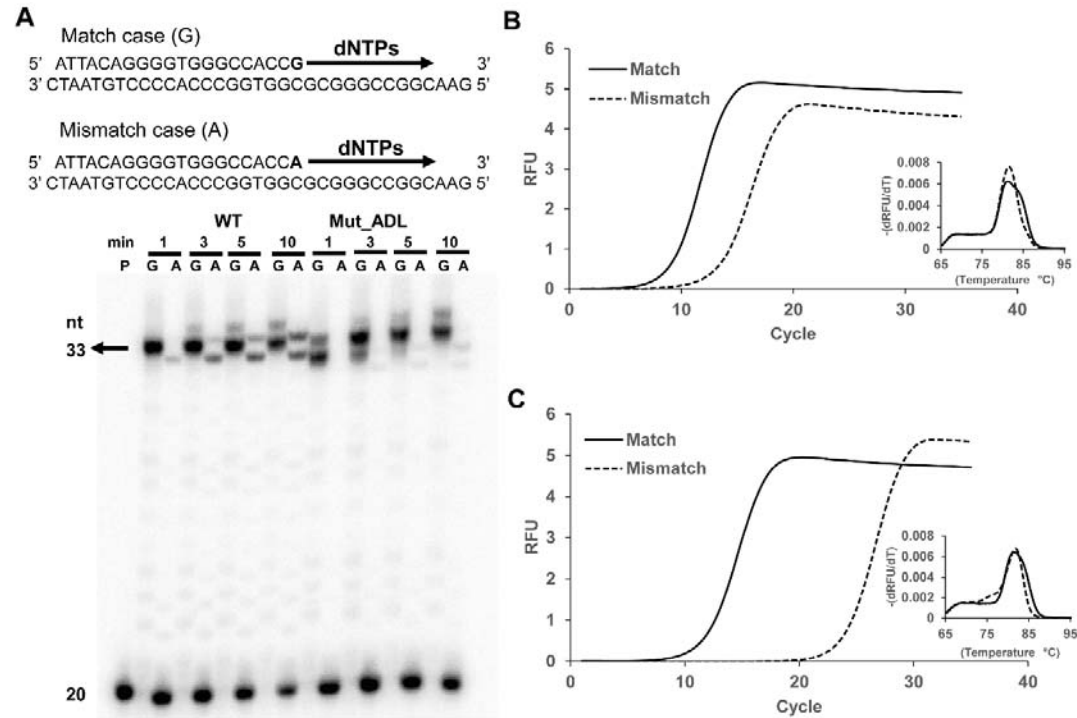

**Figure S8.** Improved allelic discrimination on different sequence context. **(A)** Sequence of employed primer-template pair. The 3' end of primer either terminates with a matched (G) or mismatched (A) nucleotide. Primer extension reaction was performed as indicated in material section for allelic discrimination, by employing the indicated DNA substrates along with wild-type (WT) and mutant DNA polymerase Mut\_ADL, respectively. Reactions were stopped at different time points, as indicated. Full-length gel is given in Supplementary Fig. S19. **(B, C)** Real time PCR reaction (20  $\mu$ l) contained 1X KlenTaq reaction buffer, 200  $\mu$ M dNTPs, 50 mM betaine (Sigma), 50 nM Taq DNA polymerase aptamer [5'-d(CGA TCA TCT CAG AAC ATT CTT AGC GTT TTG TTC TTG TGT ATG ATC G)3'] and 0.6X SYBR<sup>®</sup> Green I (Sigma). As template, 139nt [sequence of promoter region of Homo sapiens Nanog homeodomain transcription factor (NANOG) gene]<sup>1</sup> 100 pM DNA template\_1 (sequence in Supplementary Table S1) was used with 200 nM primer either Match\_case [5'-d(ATT ACA GGG GTG GGC CAC CG) 3'] or Mismatch\_case [5'-d(ATT ACA GGG GTG GGC CAC CA) 3'] and 200 nM Rev\_primer [5'-d(GGT TCA CCA CGT TTC CAA CTT TTA AAT CAG G) 3'] in two separate reactions. After an initial denaturation at 95°C for 1 min, two step thermal cycling was repeated for 35 cycles (95°C for 10 s and 68°C for 60 s) and the reaction was analysed by real-time PCR curves and melting curve measurement within the Light Cycler<sup>®</sup> 96 instrument (Roche). Real time PCR experiments with purified enzymes (200 nM), showing the discrimination property of **(B)** wild-type KlenTaq DNA polymerase and **(C)** mutant DNA polymerase Mut\_ADL respectively. Insert plot showing their corresponding melting peaks.

10 20 30 40 50 60 70 80 90 100  
Mut\_RT atgagaggatctcaccatcaccatcaccatacggatccgcatgcagcactggaagaagcaccttggcctccgcctgaagggtgcatcttgttggttttgttc  
KTQ\_pol atgagaggatctcaccatcaccatcaccatacggatccgcatgcagcactggaagaagcaccttggcctccgcctgaagggtgcatcttgttggttttgttc  
Clustal Consensus \*\*\*\*\*

110 120 130 140 150 160 170 180 190 200  
Mut\_RT tgagccgtaaagaaccgatgtgggcagatctgctggcactggcagcagcacgtgggtggtcgtgttcacatcgtgcaccggaaccgtataaagctctgcgcgga  
KTQ\_pol tgagccgtaaagaaccgatgtgggcagatctgctggcactggcagcagcacgtgggtggtcgtgttcacatcgtgcaccggaaccgtataaagctctgcgcgga  
Clustal Consensus \*\*\*\*\*

210 220 230 240 250 260 270 280 290 300  
Mut\_RT tctgaaagaagcacgcgggtctgctggcaaaagatctgagcgttctggcactgctgtaagggtctgggactgcctccgggtgatgatccgatgctgctggca  
KTQ\_pol tctgaaagaagcacgcgggtctgctggcaaaagatctgagcgttctggcactgctgtaagggtctgggactgcctccgggtgatgatccgatgctgctggca  
Clustal Consensus \*\*\*\*\*

310 320 330 340 350 360 370 380 390 400  
Mut\_RT tatctgctggatccgagcaataccacaccggaagggtttgcacgtcgttatgggtggtgaatggaccgaagaagcaggcgaacgcgcagcactgagcgaac  
KTQ\_pol tatctgctggatccgagcaataccacaccggaagggtttgcacgtcgttatgggtggtgaatggaccgaagaagcaggcgaacgcgcagcactgagcgaac  
Clustal Consensus \*\*\*\*\*

410 420 430 440 450 460 470 480 490 500  
Mut\_RT gctgtttgcaaatctgtggggtcgtctggaagggtgaagaacgtctgctgtggctgtatcgtgaagttgaacgtccgctgtctgcagttctggcacacat  
KTQ\_pol gctgtttgcaaatctgtggggtcgtctggaagggtgaagaacgtctgctgtggctgtatcgtgaagttgaacgtccgctgtctgcagttctggcacacat  
Clustal Consensus \*\*\*\*\*

510 520 530 540 550 560 570 580 590 600  
Mut\_RT ggaagcaaccgggtttcgtctggatgttgcatatctcgttgcaactgagcctggaagttgcagaagaattgcacgtctggaagcagaagtttttcgtctg  
KTQ\_pol ggaagcaaccgggtttcgtctggatgttgcatatctcgttgcaactgagcctggaagttgcagaagaattgcacgtctggaagcagaagtttttcgtctg  
Clustal Consensus \*\*\*\*\*

610 620 630 640 650 660 670 680 690 700  
Mut\_RT GCCGGCCATCCGtTTaAACTGAATAGCCGTGATCAGCTGGAACGtGTTCTGTTTGATGAACTGGGCTGCCAGCAATTGGTAAAACCaAAAACCCGGTA  
KTQ\_pol gaggccatccgttt aatctgaaatagccgtgatcagctggaacgtgttctgtttgatgaactgggtctgccagcaattggtaaaaaccgaaacccggta  
Clustal Consensus \*\*\*\*\*  
**N483** **E507**

710 720 730 740 750 760 770 780 790 800  
Mut\_RT AACGTAGcaCCAGCGCAGCAGTTCGGAGCCCTGCGTGAAGCACATCCGATTGTGGAATAAATCTGCAGTATCGGAACTGACCTACCTGAAAAGCAC  
KTQ\_pol aacgtagcaccagcgcagcagttctggaaccctgcgtgaagcacatccgattgtggaataaattctgcagtatcgcgaactgaccaaacctgaaaagcac  
Clustal Consensus \*\*\*\*\*  
**K540**

```
      810      820      830      840      850      860      870      880      890      900
Mut_RT    .....|.....|.....|.....|.....|.....|.....|.....|.....|.....|.....|.....|
KTQ_pol   CTATATCGATCCGCTGCCGGATCTGATTCATCCGCGTACCGGTCGTCCTGCATACCCGTTTTAAATCAGACCCGCAACCCGCAACCCGGTCGCCCTGAGCAGCAGC
Clustal Consensus *****|.....|.....|.....|.....|.....|.....|.....|.....|.....|.....|.....|.....|*****
```

```
      910      920      930      940      950      960      970      980      990      1000
Mut_RT    .....|.....|.....|.....|.....|.....|.....|.....|.....|.....|.....|.....|
KTQ_pol   GATCCGAATCTGCAGAAATTCCTGGTCTGACACCCGCTGGGTCAGCGTATTCGTCGTGCATTTATTGCAGAGAAGGTGGCTGCTGGTTGCACTGGATT
Clustal Consensus *****|.....|.....|.....|.....|.....|.....|.....|.....|.....|.....|.....|.....|*****
```

```
      1010      1020      1030      1040      1050      1060      1070      1080      1090      1100
Mut_RT    .....|.....|.....|.....|.....|.....|.....|.....|.....|.....|.....|.....|
KTQ_pol   ATAGCCAGAAAGAACTGCGTCTTCTGGCCCATCTGAGCGGTGATGAAAATCTGATTCGCGTGTTCAGGAAGGTCGCGATATTCTACCGAAACCCGCAAG
Clustal Consensus *****|.....|.....|.....|.....|.....|.....|.....|.....|.....|.....|.....|.....|*****
```

```
      1110      1120      1130      1140      1150      1160      1170      1180      1190      1200
Mut_RT    .....|.....|.....|.....|.....|.....|.....|.....|.....|.....|.....|.....|
KTQ_pol   CTGGATGTTTGGTGTTCGCGCTGAAGCAGTTGATCCGCTGATCGCTCGTCAGCAAAAACCATTAATTTTGGGGTGCTGTATGGTATGAGCCGACATCGT
Clustal Consensus *****|.....|.....|.....|.....|.....|.....|.....|.....|.....|.....|.....|.....|*****
```

```
      1210      1220      1230      1240      1250      1260      1270      1280      1290      1300
Mut_RT    .....|.....|.....|.....|.....|.....|.....|.....|.....|.....|.....|.....|
KTQ_pol   CTGAGCCAGGAAC TGGCAATTCCGTACGAAGAAGCCAGGCATTTATCGAACGTTATTTTCAGAGCTTTCGGAAGTTCGTGCC TGGATTGAAAAAACCC
Clustal Consensus *****|.....|.....|.....|.....|.....|.....|.....|.....|.....|.....|.....|.....|*****
```

```
      1310      1320      1330      1340      1350      1360      1370      1380      1390      1400
Mut_RT    .....|.....|.....|.....|.....|.....|.....|.....|.....|.....|.....|.....|
KTQ_pol   TGAAGAAAGGTCGTCGCGGTTATGTTGAAACCCTGTTTGGTCGTCGTCGTTATGTTCCGGATCTGGAGGCACGTGTTAAAAGCCTTCGTGAAGCAGC
Clustal Consensus *****|.....|.....|.....|.....|.....|.....|.....|.....|.....|.....|.....|.....|*****
```

```
      1410      1420      1430      1440      1450      1460      1470      1480      1490      1500
Mut_RT    .....|.....|.....|.....|.....|.....|.....|.....|.....|.....|.....|.....|
KTQ_pol   AGAACGTATGGCCTTAAATATGCCGTTTCAGGGCACCGCAGCATCTGATGAAACTGGCCATGGTTAACTGTTTCCGCTCTGGAAGAAATGGGTGCA
Clustal Consensus *****|.....|.....|.....|.....|.....|.....|.....|.....|.....|.....|.....|.....|*****
```



```

      1510      1520      1530      1540      1550      1560      1570      1580      1590      1600
Mut_RT      CGTATGCTGCTGCAGGTTCATGATGAACTGGTGCTGGAAGCACCGAAAGAACGTGCAGAAGCAGTGCCCGCTGGCAAAGAAGTTATGGAGGCGTTT
KTQ_pol     cgtatgctgctgcaggttcatgatgaactggtgctggaagcaccgaaagaacgtgcagaagcagttgcccgtctggcaaaagaagttatggaggcgtt
Clustal Consensus *****

      1610      1620      1630      1640      1650      1660
Mut_RT      ATCCGCTGGCAGTTCCGCTGGAGTTGAAGTTGGTATTGGTGAAGATTGGCTGTCTGCCAAAAGATaa
KTQ_pol     atccgctggcagttccgctggaagttgaagttggtattggtgaagattggctgtctgcaaaagaa---
Clustal Consensus *****

```

**Figure S9.**

Nucleotide sequence alignment of wild type KlenTaq DNA polymerase and Mut\_RT. Red boxes with solid black line marks the target sites of mutations and the change in codon. The numbering in alignment ruler are arbitrary. Position E734 marked in green box without border line, was not a target site for mutagenesis and a silent mutation (A→G) had occurred during PCR amplification.

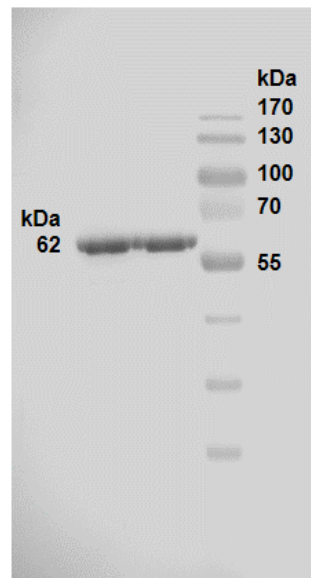

**Figure S10**

SDS-PAGE of Ni-NTA purified 6X-His tagged WT (left) and Mut\_RT (middle).

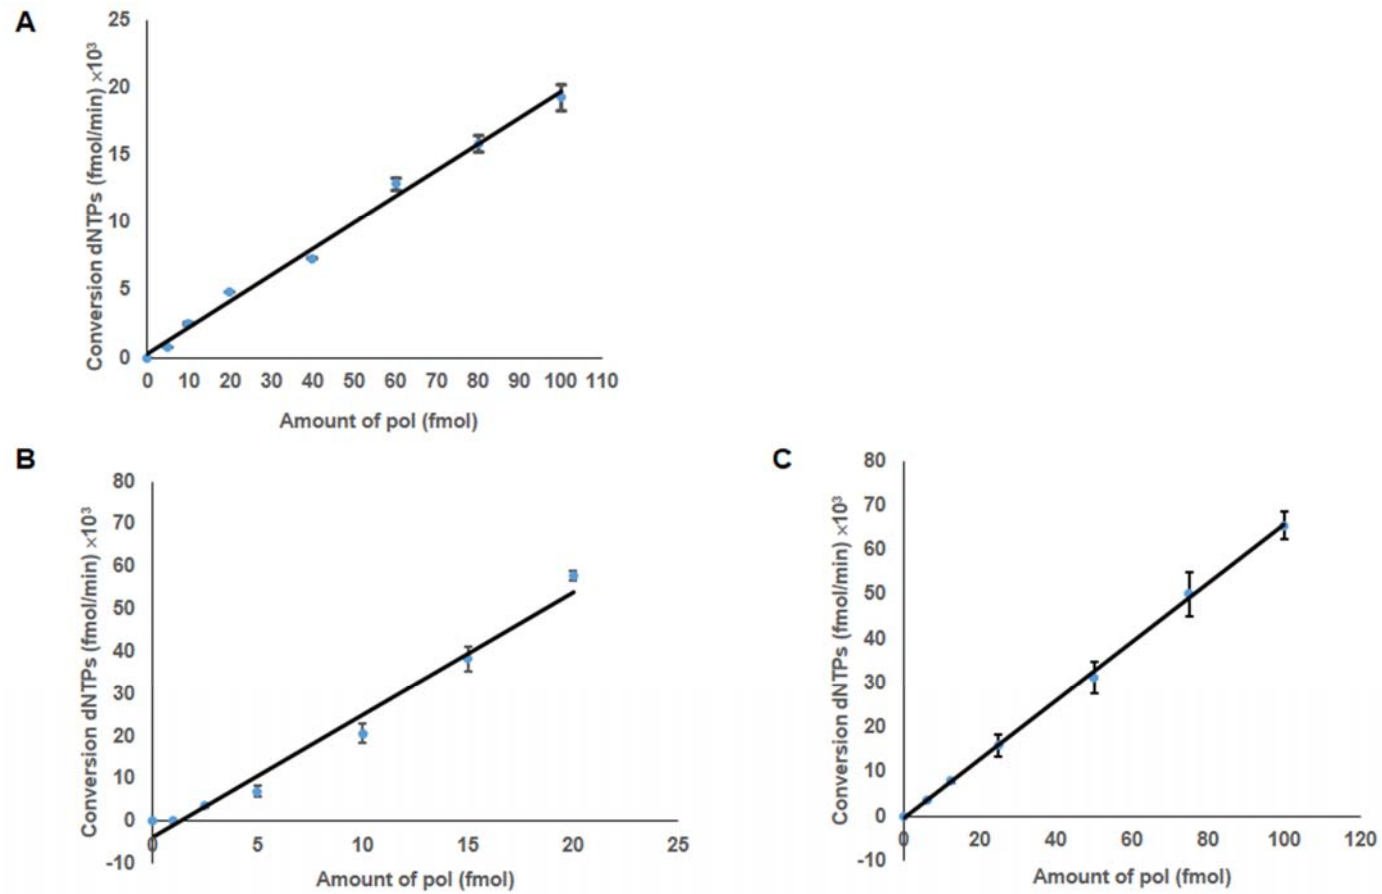

**Figure S11.**

Specific activities. (A) dNTP conversion rate plotted against the amount of Mut\_RT applied on RNA template. dNTP conversion rate of Mut\_RT (B) and wild type KlenTaq DNA polymerase (C) plotted against the amount of enzyme applied on DNA template. Error bars describe SD ( $n = 3$ ).

A

G A C C C A C C C C T C C T G G C G G G C A C A C C C C C T A

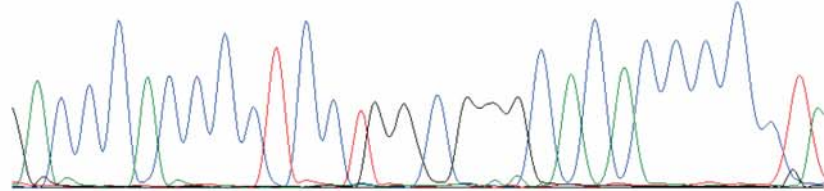

10 20 30 40 50

Mut\_RT\_Forward\_primer  
DNA\_Template  
Mut\_RT\_Reverse\_primer

. . . . | . . . . | . . . . | . . . . | . . . . | . . . . | . . . . | . . . . | . . . . | . . . . |  
- - - - | - - - - | - - - - | - - - - | - - - - | - - - - | - - - - | - - - - | - - - - | - - - - |  
G A C C C A C C C C T C C T G G C G G G C A C A C C C C C T A  
A C C T T A G A C C C A C C C C T C C T G G C G G G C A C A C C C C C T A C T G A C C C A C C C T T  
- - - - | - - - - | - - - - | - - - - | - - - - | - - - - | - - - - | - - - - | - - - - | - - - - |

Mut\_RT\_Forward\_primer  
DNA\_Template  
Mut\_RT\_Reverse\_primer

. . . . | . . . . | . . . . | . . . . | . . . . | . . . . | . . . . | . . . . | . . . . | . . . . |  
- - - - | - - - - | - - - - | - - - - | - - - - | - - - - | - - - - | - - - - | - - - - | - - - - |  
G T G A A T T C T C A G T T A A T C C C G T C T A C C A G T C T C A C C A A G G C C  
- - - - | - - - - | - - - - | - - - - | - - - - | - - - - | - - - - | - - - - | - - - - | - - - - |  
A T T C T C A G T T A A T C C C G T C T A C C A G  
A T T C T C A G T T A A T C C C G T C T A C C A G

60 70 80 90

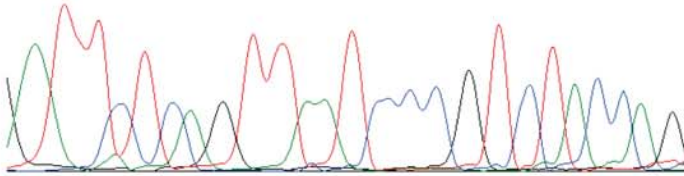





Figure S13 (Full image of 4A)

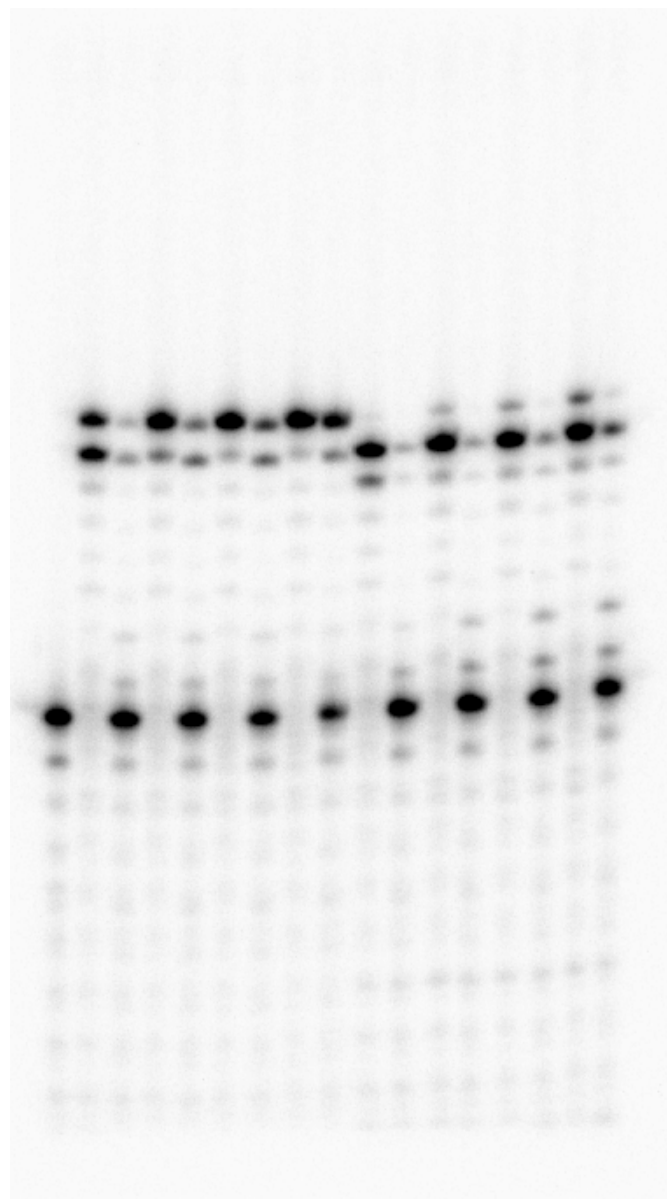

Figure S14 (Full image of 5C)

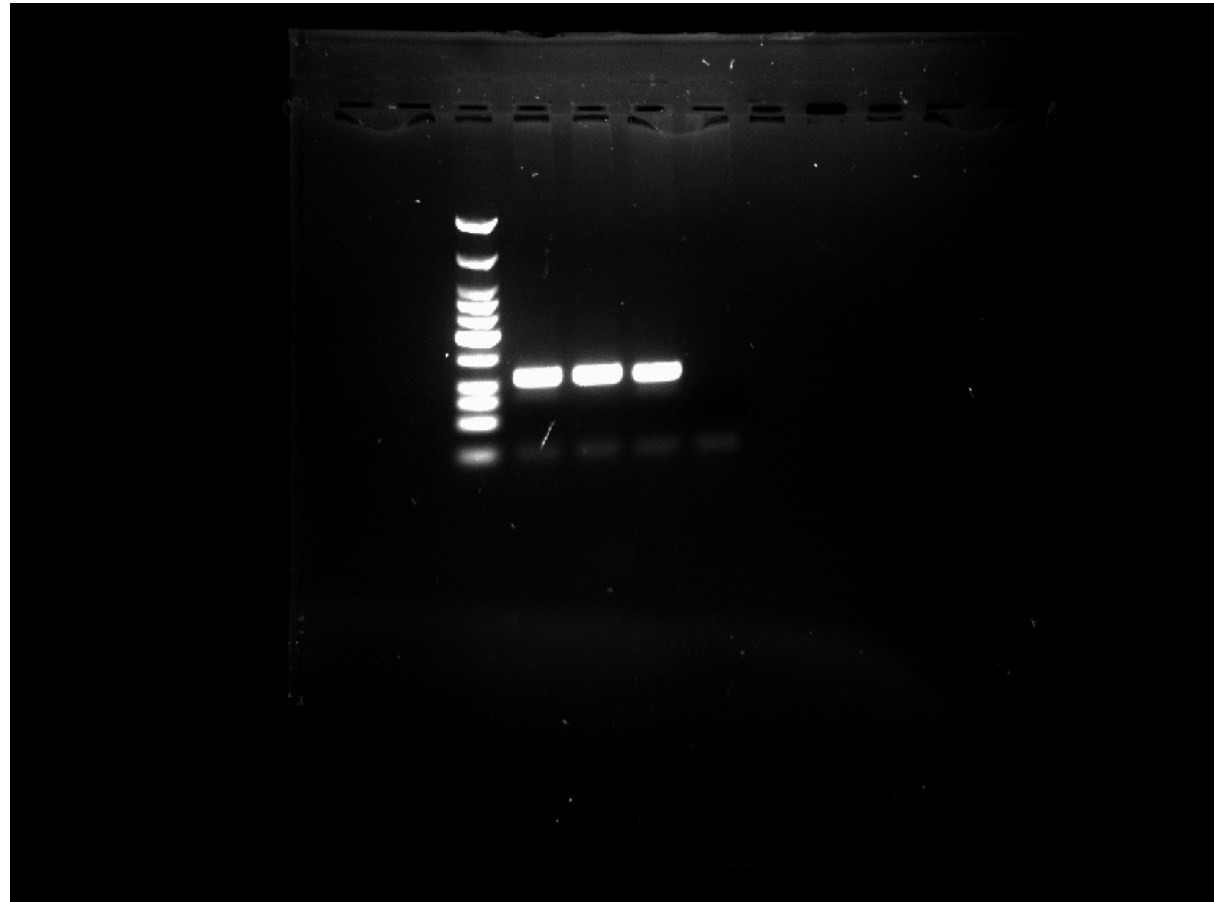

Figure S15 (Full image of 5E)

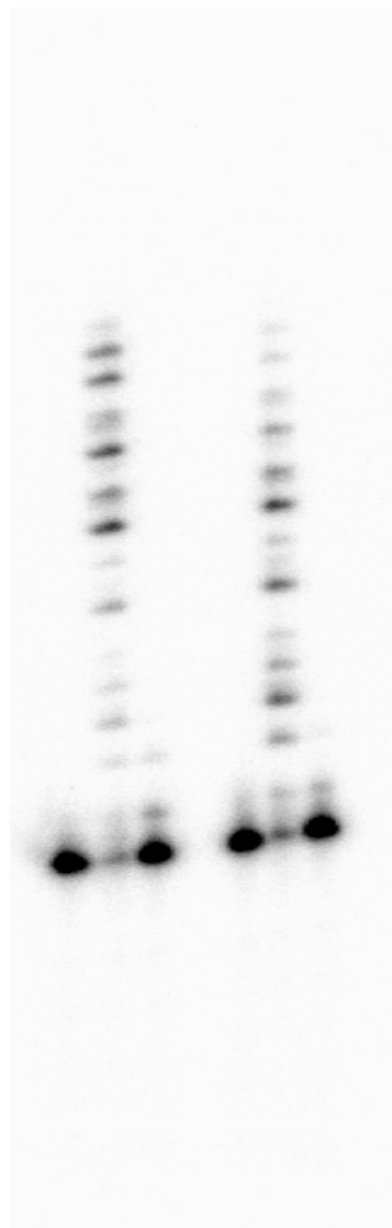



Figure S16 (Full image of 6B)

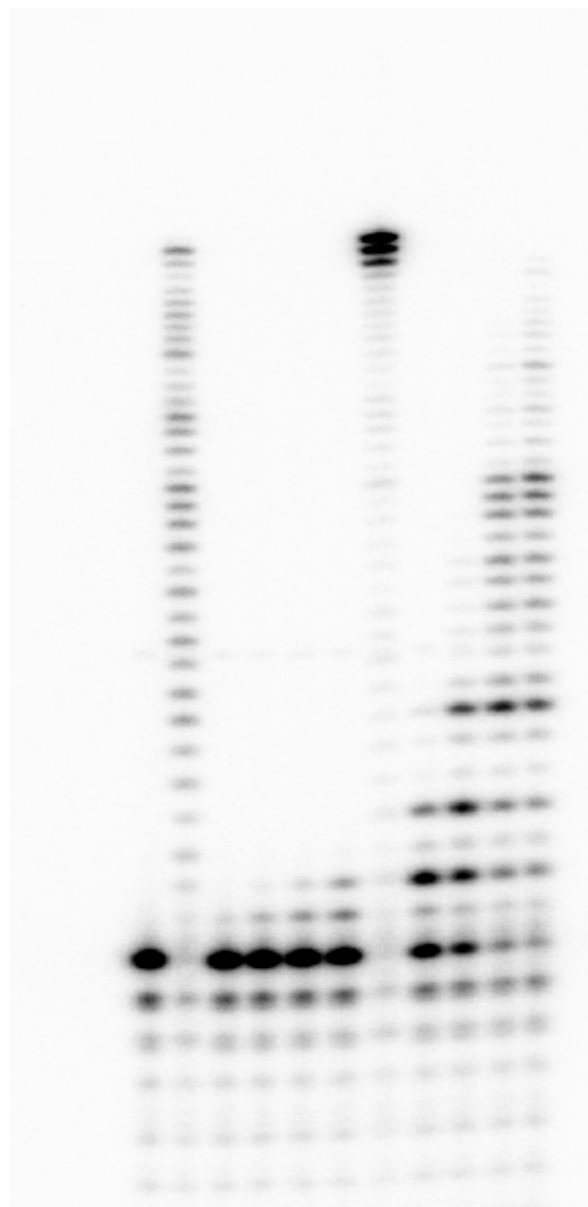

Figure S17 (Full image of 6D)

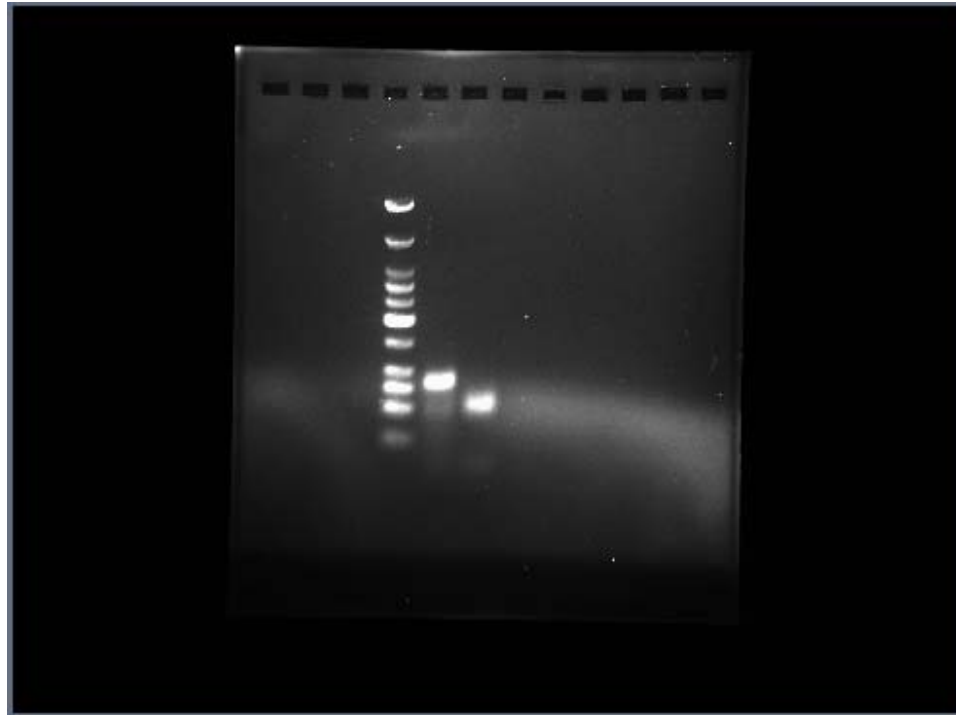

Figure S18 (Full image of S7)

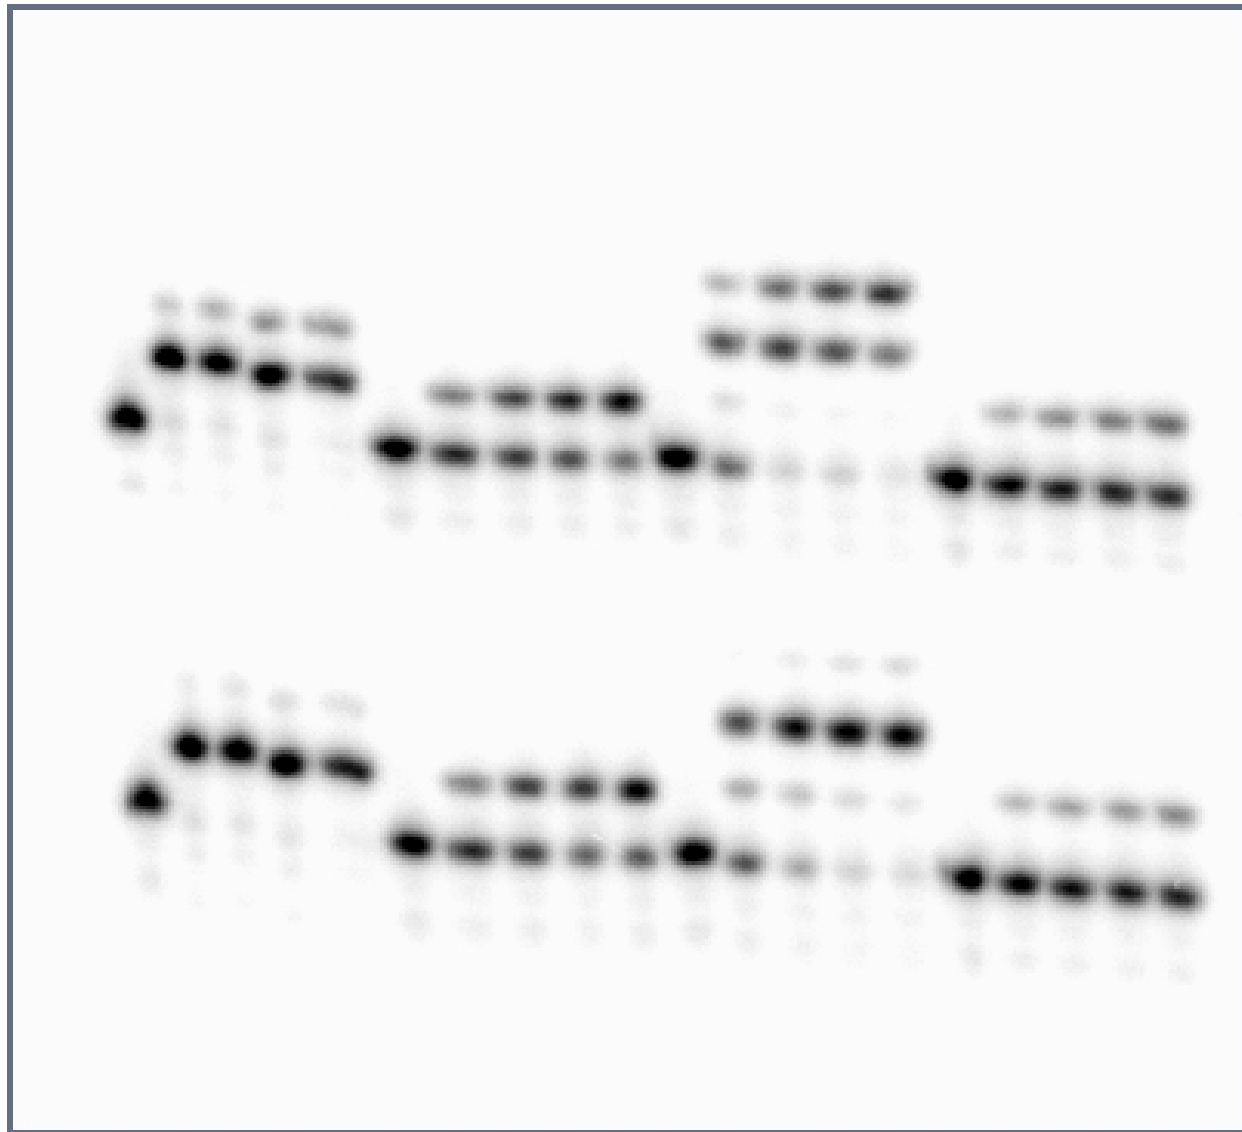

Figure S19 (Full image of S8)

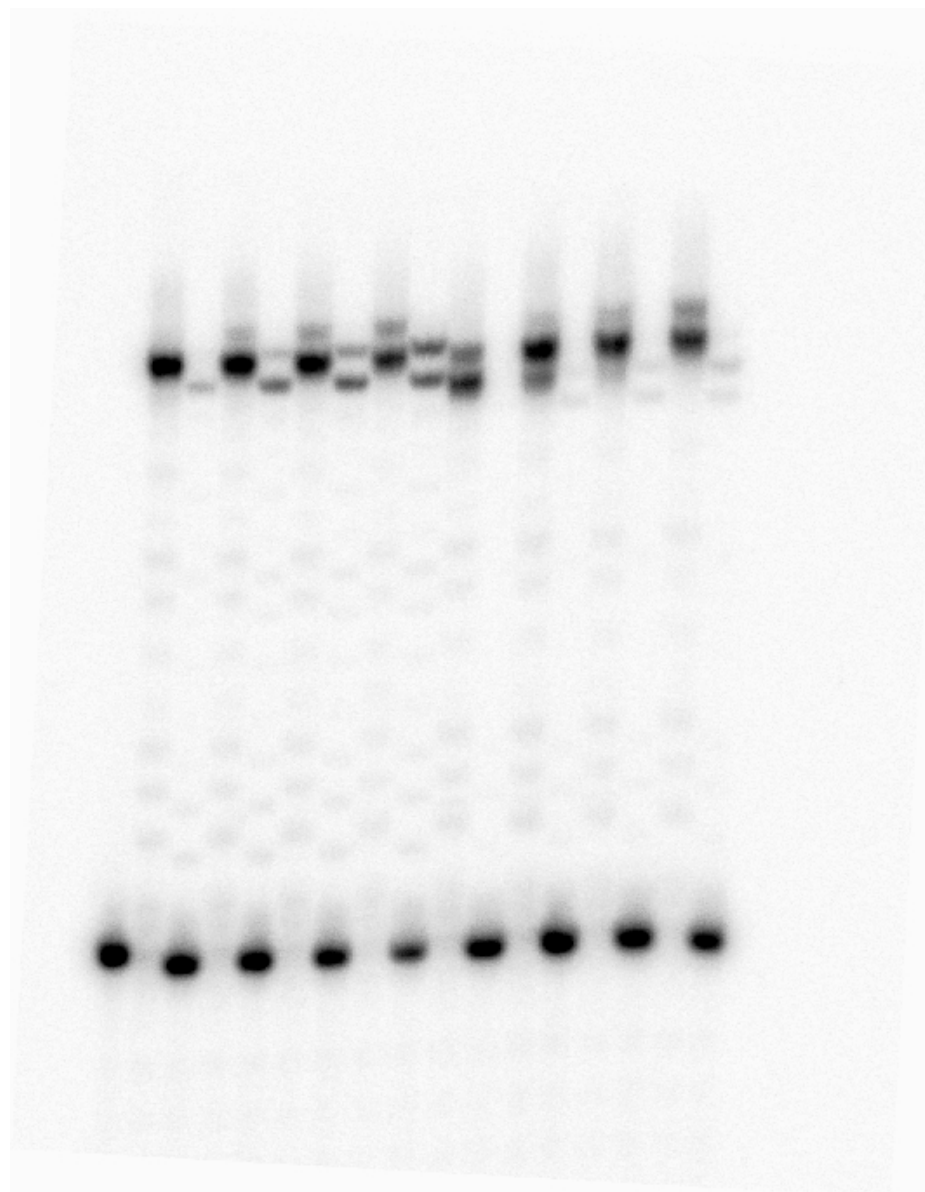



**Reference:**

1. Li,J., Han,C., Deng,J. and Wang,H. Cloning and Preliminary Characterization of Human Nanog Promoter, Unpublished, GenBank: GU433186.1  
GI: 289547169, Animal Biotechnology, Northwest A&F University, Taicheng Road No. 3, Yangling, Shaanxi 712100, China
